# Supplementary material for: A Novel Pyrimidin-Like Plant Activator Stimulates Plant Disease Resistance and Promotes Growth
Source: PubMed Central journal article supplement (PMC4388471; doi:10.1371/journal.pone.0123227), 2015-04-07
Supplement: pone.0123227.s004.pdf [file pone.0123227.s004.pdf]

| annotation |             |                                                                                               | function |    |     | expression |        |        |
|------------|-------------|-----------------------------------------------------------------------------------------------|----------|----|-----|------------|--------|--------|
| TAIRid     | symbol      | description                                                                                   | defense  | SA | ROS | PPA5h      | PPA10h | PPA24h |
| AT2G37430  | ZAT11       | zinc finger protein ZAT11                                                                     | +        | -  | +   | 8.15       | 8.22   | 5.91   |
| AT1G51800  | IOS1        | putative leucine-rich repeat protein kinase                                                   | +        | -  | +   | 7.92       | 8.27   | 7.59   |
| AT3G11340  | UGT76B1     | UDP-dependent glycosyltransferase 76B1                                                        | +        | -  | -   | 7.77       | 11.41  | 9.81   |
| AT3G01830  | AT3G01830   | putative calcium-binding protein CML40                                                        | +        | +  | +   | 7.44       | 9.24   | 9.22   |
| AT4G04490  | CRK36       | cysteine-rich receptor-like protein kinase 36                                                 | +        | +  | -   | 7.26       | 9.51   | 8.98   |
| AT5G57220  | CYP81F2     | cytochrome P450, family 81, subfamily F, polypeptide 2                                        | +        | -  | -   | 7.11       | 6.51   | 4.58   |
| AT5G24110  | WRKY30      | WRKY DNA-binding protein 30                                                                   | -        | +  | +   | 6.67       | 6.94   | 7.83   |
| AT1G26420  | AT1G26420   | FAD-binding and BBE domain-containing protein                                                 | +        | -  | +   | 6.59       | 8.86   | 8.49   |
| AT5G42380  | CML37       | calcium-binding protein CML37                                                                 | +        | -  | -   | 6.38       | 7.69   | 8.51   |
| AT4G21390  | B120        | G-type lectin S-receptor-like serine/threonine-protein kinase B120                            | +        | +  | +   | 6.37       | 6.53   | 4.8    |
| AT1G05680  | UGT74E2     | Uridine diphosphate glycosyltransferase 74E2                                                  | -        | -  | +   | 6.22       | 6.35   | 3.4    |
| AT4G39670  | AT4G39670   | glycolipid transfer protein                                                                   | +        | +  | +   | 6.13       | 7.53   | 7.33   |
| AT1G13470  | AT1G13470   | hypothetical protein                                                                          | +        | +  | +   | 6.07       | 8.6    | 9.03   |
| AT1G78410  | AT1G78410   | VQ motif-containing protein                                                                   | +        | +  | +   | 6.01       | 7.85   | 8.05   |
| AT5G51440  | AT5G51440   | heat shock protein 23.5                                                                       | -        | -  | +   | 5.99       | 6.58   | 2.48   |
| AT1G19250  | FM01        | flavin-dependent monooxygenase 1                                                              | +        | -  | -   | 5.71       | 10.41  | 9.22   |
| AT5G41740  | AT5G41740   | TIR-NBS-LRR class disease resistance protein///TIR-NBS-LRR class disease resistance protein   | +        | -  | -   | 5.63       | 7.05   | 7.09   |
| AT3G63380  | AT3G63380   | putative calcium-transporting ATPase 12                                                       | +        | -  | +   | 5.51       | 7.48   | 6.02   |
| AT5G13320  | PBS3        | 4-substituted benzoates-glutamate ligase GH3.12                                               | +        | +  | +   | 5.32       | 8.89   | 9.18   |
| AT4G02380  | SAG21       | senescence-associated protein                                                                 | +        | +  | +   | 5.3        | 6.4    | 5.99   |
| AT1G28480  | GRX480      | glutaredoxin-GRX480                                                                           | +        | +  | +   | 5.21       | 7.14   | 7.19   |
| AT3G23250  | MYB15       | myb domain protein 15                                                                         | +        | -  | +   | 5.21       | 6.37   | 7.03   |
| AT3G11080  | RLP35       | receptor like protein 35                                                                      | +        | -  | -   | A          | A      | 5.58   |
| AT3G13100  | ABCC7       | ABC transporter C family member 7                                                             | -        | +  | -   | 5.17       | 7.67   | 7.4    |
| AT2G26150  | HSFA2       | heat stress transcription factor A-2                                                          | -        | -  | +   | 5.16       | 5.4    | 5.87   |
| AT4G16260  | AT4G16260   | putative beta-1,3-endoglucanase that interacts with the 30C02 cyst nematode effector. May pla | +        | -  | -   | 5.03       | 6.02   | 4.46   |
| AT1G71000  | AT1G71000   | chaperone DnaJ-domain containing protein                                                      | -        | -  | +   | A          | 7.19   | A      |
| AT1G80840  | WRKY40      | putative WRKY transcription factor 40                                                         | +        | +  | +   | 5.01       | 5.28   | 5.03   |
| AT3G09940  | MDHAR       | monodehydroascorbate reductase (NADH)                                                         | -        | -  | +   | 4.82       | 7.21   | 7.28   |
| AT4G23190  | CRK11       | cysteine-rich receptor-like protein kinase 11                                                 | +        | -  | +   | 4.77       | 4.97   | 5.03   |
| AT3G28740  | CYP81D11    | cytochrome P450 CYP81D11                                                                      | +        | -  | -   | 4.76       | 3.87   | 1.89   |
| AT4G35180  | LHT7        | LYS/HIS transporter 7                                                                         | +        | -  | -   | 4.73       | 6.86   | 6.3    |
| AT5G22530  | AT5G22530   | hypothetical protein                                                                          | -        | +  | -   | 4.69       | 7.48   | 5.66   |
| AT1G19020  | AT1G19020   | hypothetical protein                                                                          | +        | +  | +   | 4.67       | 5.67   | 5.27   |
| AT2G44960  | HUB1        | E3 ubiquitin-protein ligase BRE1-like 1                                                       | +        | -  | +   | A          | A      | 4.71   |
| AT1G27730  | STZ         | zinc finger protein STZ/ZAT10                                                                 | +        | -  | +   | 4.61       | 4.95   | 5.07   |
| AT2G03760  | SOT12       | sulphotransferase 12                                                                          | +        | +  | +   | 4.52       | 4.38   | 1.38   |
| AT5G13330  | Rap2.6L     | ethylene-responsive transcription factor ERF113                                               | -        | +  | -   | A          | A      | 6.99   |
| AT2G35980  | YLS9        | late embryogenesis abundant hydroxyproline-rich glycoprotein                                  | +        | +  | +   | 4.49       | 6.76   | 7.79   |
| AT3G26830  | PAD3        | bifunctional dihydrocamalexate synthase/camalexin synthase                                    | +        | +  | +   | 4.46       | 6.99   | 5.62   |
| AT1G72900  | AT1G72900   | Toll-Interleukin-Resistance domain-containing protein                                         | +        | +  | -   | 4.39       | 4.96   | 4      |
| AT4G25200  | HSP23.6-MI1 | small heat shock protein 23.6                                                                 | -        | -  | +   | 4.38       | 4.44   | A      |
| AT3G25250  | AGC2-1      | AGC (cAMP-dependent, cGMP-dependent and protein kinase C) kinase family protein               | -        | -  | +   | 4.34       | 5.05   | 3.75   |
| AT2G32140  | AT2G32140   | transmembrane receptor protein                                                                | +        | -  | -   | 4.33       | 6.51   | 7.02   |

|           |           |                                                                               |   |   |   |      |       |       |
|-----------|-----------|-------------------------------------------------------------------------------|---|---|---|------|-------|-------|
| AT2G18690 | AT2G18690 | hypothetical protein                                                          | + | + | - | 4.29 | 6.25  | 5.95  |
| AT3G50930 | BCS1      | cytochrome BC1 synthesis                                                      | + | + | - | 4.27 | 5.72  | 5.68  |
| AT1G65390 | PP2-A5    | protein PHLOEM protein 2-LIKE A5                                              | + | - | - | 4.26 | A     | A     |
| AT4G17490 | ERF6      | ethylene responsive element binding factor 6                                  | + | - | + | 4.24 | 3.79  | 2.25  |
| AT1G63490 | AT1G63490 | transcription factor jumonji (jmjC) domain-containing protein                 | - | - | + | 4.16 | 4.07  | A     |
| AT1G16420 | MC8       | metacaspase 8                                                                 | - | - | + | 4.13 | 5.98  | 6.18  |
| AT3G57240 | BG3       | beta-1,3-glucanase 3                                                          | + | + | + | 4.09 | 5.12  | 3.14  |
| AT5G52760 | AT5G52760 | copper transport family protein                                               | + | + | + | 4.07 | 5.69  | 6.13  |
| AT4G14365 | XBAT34    | putative E3 ubiquitin-protein ligase XBAT34                                   | + | + | + | 4.05 | 5.95  | 5.68  |
| AT1G21250 | WAK1      | wall-associated receptor kinase 1                                             | + | + | - | 4    | 5.15  | 5.02  |
| AT3G57460 | AT3G57460 | catalytic/ metal ion binding / metalloendopeptidase/ zinc ion binding protein | - | + | - | 3.98 | 5.07  | 4.97  |
| AT2G32030 | AT2G32030 | GCN5-related N-acetyltransferase-like protein                                 | + | - | + | 3.95 | 4.21  | 3.99  |
| AT2G24850 | TAT3      | tyrosine aminotransferase 3                                                   | - | + | - | 3.95 | 6.86  | 6.69  |
| AT2G13810 | ALD1      | AGD2-like defense response protein 1                                          | + | + | - | A    | 7.3   | 6.74  |
| AT3G47460 | ATSMC2    | structural maintenance of chromosomes protein 2-2                             | + | - | - | A    | 3.73  | A     |
| AT2G26560 | PLA2A     | phospholipase A 2A                                                            | + | + | + | 3.74 | 4.71  | 1.75  |
| AT4G11170 | RMG1      | putative disease resistance protein                                           | + | - | - | A    | 5     | 4.98  |
| AT2G29500 | AT2G29500 | HSP20 family protein                                                          | - | - | + | 3.71 | 4     | 1.16  |
| AT5G27420 | CNI1      | E3 ubiquitin-protein ligase ATL31                                             | + | - | + | 3.71 | 4.17  | 3.66  |
| AT5G12030 | HSP17.6A  | heat shock protein 17.6A                                                      | - | - | + | 3.69 | 3.16  | 4.46  |
| AT1G02930 | GSTF6     | glutathione S-transferase 6///glutathione S-transferase 7/11                  | + | - | + | 3.63 | 4.72  | 4.19  |
| AT1G56520 | AT1G56520 | TIR-NBS-LRR class disease resistance protein                                  | + | - | - | A    | 4.18  | 3.15  |
| AT3G26210 | CYP71B23  | cytochrome P450 71B23                                                         | + | - | - | 3.58 | 4.8   | 5     |
| AT3G12580 | HSP70     | heat shock protein 70-4                                                       | - | - | + | 3.57 | 5.35  | 3.88  |
| AT5G52750 | AT5G52750 | heavy metal transport/detoxification domain-containing protein                | + | - | - | 3.56 | 3.93  | 4.39  |
| AT3G01290 | HIR2      | SPFH/Band 7/PHB domain-containing membrane-associated protein                 | + | - | - | 3.56 | 4.38  | 4.29  |
| AT4G11890 | ARCK1     | protein kinase family protein                                                 | + | + | + | 3.52 | 5.62  | 5.17  |
| AT1G05560 | UGT75B1   | UDP-glucosyltransferase 75B1                                                  | - | + | - | 3.52 | 3.37  | 1.21  |
| AT1G02360 | AT1G02360 | putative chitinase                                                            | + | - | + | 3.5  | 4.55  | 4.07  |
| AT1G74310 | HSP101    | heat shock protein 101                                                        | - | - | + | 3.49 | 4.53  | 4.1   |
| AT5G05300 | AT5G05300 | hypothetical protein                                                          | + | - | - | 3.49 | 4.38  | 4.57  |
| AT1G74360 | AT1G74360 | putative LRR receptor-like serine/threonine-protein kinase                    | + | + | + | 3.48 | 4.22  | 4.09  |
| AT4G23210 | CRK13     | cysteine-rich receptor-like protein kinase 13                                 | + | - | + | 3.47 | 5.42  | 4.59  |
| AT5G20230 | BCB       | blue-copper-binding protein                                                   | + | - | + | 3.44 | 4.92  | 5.42  |
| AT2G43620 | AT2G43620 | chitinase                                                                     | + | - | + | 3.44 | 3.71  | 1.88  |
| AT3G05360 | RLP30     | receptor like protein 30                                                      | + | + | - | A    | 5.16  | 4.6   |
| AT5G52640 | HSP90.1   | heat shock protein 90.1                                                       | + | - | + | 3.43 | 6.02  | 3.85  |
| AT4G33050 | EDA39     | calmodulin-binding protein                                                    | + | + | + | 3.39 | 4.47  | 4.38  |
| AT2G15120 | AT2G15120 | basic secretory protein family protein                                        | + | - | - | A    | 3.08  | A     |
| AT3G28510 | AT3G28510 | AAA-type ATPase family protein                                                | - | + | + | A    | 10.23 | 11.28 |
| AT3G60420 | AT3G60420 | phosphoglycerate mutase family protein                                        | + | + | - | 3.38 | 5.17  | 5.18  |
| AT4G15975 | AT4G15975 | RING-H2 finger protein ATL17                                                  | + | - | + | 3.35 | A     | A     |
| AT4G20860 | AT4G20860 | FAD-binding Berberine family protein                                          | + | - | + | 3.35 | 3.4   | 3.07  |
| AT1G35710 | AT1G35710 | putative leucine-rich repeat receptor-like protein kinase                     | + | - | - | 3.35 | 4.37  | 4.58  |
| AT4G20830 | AT4G20830 | FAD-binding Berberine family protein                                          | + | - | + | 3.32 | 4.03  | 3.79  |
| AT5G22570 | WRKY38    | putative WRKY transcription factor 38                                         | + | + | + | 3.28 | 6.14  | 5.36  |

|           |           |                                                                               |   |   |   |   |      |       |       |
|-----------|-----------|-------------------------------------------------------------------------------|---|---|---|---|------|-------|-------|
| AT5G52050 | AT5G52050 | MATE efflux family protein                                                    | + | - | - |   | 3.27 | 3.21  | 3.53  |
| AT5G59820 | RHL41     | high light responsive zinc finger protein ZAT12                               | - | - | + |   | 3.21 | 4.77  | 4.56  |
| AT2G47000 | ABCB4     | auxin efflux transmembrane transporter MDR4                                   | - | - | + |   | 3.12 | 5.11  | 1.85  |
| AT1G61340 | FBS1      | F-box protein                                                                 | - | + | - |   | 3.09 | 2.71  | 2.31  |
| AT1G47890 | RLP7      | receptor like protein 7                                                       | + | - | - | A |      | 4.97  | 5.54  |
| AT2G38470 | WRKY33    | putative WRKY transcription factor 33                                         | + | + | + |   | 3.04 | 3.73  | 3.41  |
| AT3G48640 | AT3G48640 | hypothetical protein                                                          | + | + | + |   | 3.04 | 5.31  | 5.63  |
| AT2G29420 | GSTU7     | glutathione S-transferase tau 7                                               | - | + | - |   | 3.01 | 3.28  | 2.19  |
| AT4G22530 | AT4G22530 | S-adenosyl-L-methionine-dependent methyltransferase domain-containing protein | + | - | + |   | 3.01 | 3.3   | 1.71  |
| AT1G72520 | LOX4      | lipoxygenase 4                                                                | + | - | - |   | 3.01 | 4.9   | 4.27  |
| AT1G66090 | AT1G66090 | TIR-NBS class of disease resistance protein                                   | + | + | - |   | 3    | 3.37  | 4.04  |
| AT4G23220 | CRK14     | cysteine-rich receptor-like protein kinase 14                                 | - | + | - |   | 3    | 4.13  | 3.55  |
| AT1G52200 | AT1G52200 | PLAC8 family protein                                                          | - | - | + |   | 2.99 | 3.85  | 1.67  |
| AT1G76600 | AT1G76600 | hypothetical protein                                                          | + | - | + |   | 2.98 | 3.23  | 2.2   |
| AT4G23810 | WRKY53    | putative WRKY transcription factor 53                                         | + | + | + |   | 2.96 | 3.88  | 4.56  |
| AT1G72920 | AT1G72920 | Toll-Interleukin-Resistance domain-containing protein                         | + | - | - |   | 2.94 | 2.48  | 2.37  |
| AT2G16870 | AT2G16870 | TIR-NBS-LRR class disease resistance protein                                  | + | - | - | A |      | 4.59  | 4.7   |
| AT4G22980 | AT4G22980 | hypothetical protein                                                          | + | + | - |   | 2.9  | 4.17  | 3.33  |
| AT1G57630 | AT1G57630 | Toll-Interleukin-Resistance domain-containing protein                         | + | + | - |   | 2.9  | 5.94  | 5.8   |
| AT4G23150 | CRK7      | cysteine-rich receptor-like protein kinase 7                                  | - | + | - |   | 2.9  | 6.84  | 7.05  |
| AT3G16530 | AT3G16530 | legume lectin-like protein                                                    | + | - | - |   | 2.89 | 2.45  | 1.51  |
| AT1G09970 | LRR XI-23 | leucine-rich receptor-like protein kinase                                     | + | - | + |   | 2.89 | 3.29  | 2.45  |
| AT5G26920 | CBP60G    | Cam-binding protein 60-like G                                                 | + | + | + |   | 2.89 | 4.61  | 5.13  |
| AT5G60950 | COBL5     | COBRA-like protein 5                                                          | + | + | - |   | 2.76 | 3.73  | 4.31  |
| AT2G14560 | LURP1     | LURP1 protein                                                                 | + | + | + |   | 2.74 | 4.45  | 4.4   |
| AT1G75040 | PR5       | pathogenesis-related protein 5                                                | + | + | + |   | 2.73 | 4.12  | 5.08  |
| AT1G14870 | PCR2      | cadmium resistance protein 1///cadmium resistance protein 2                   | - | - | + |   | 2.71 | 5.67  | 6.27  |
| AT4G26120 | AT4G26120 | regulatory protein NPR2                                                       | + | + | + | A |      | 4.04  | 4.97  |
| AT2G33710 | AT2G33710 | ethylene-responsive transcription factor ERF112                               | + | - | + | A | A    |       | 4.38  |
| AT3G56710 | SIB1      | sigma factor binding protein 1                                                | + | + | + |   | 2.7  | 2.92  | 2.12  |
| AT2G23680 | AT2G23680 | Cold acclimation protein WCOR413 family                                       | + | + | + |   | 2.68 | 3.79  | 3.33  |
| AT5G25930 | AT5G25930 | protein kinase family protein with leucine-rich repeat domain                 | + | - | + |   | 2.64 | 3.5   | 2.79  |
| AT5G54610 | ANK       | ankyrin repeat family protein                                                 | + | + | + |   | 2.63 | 2.78  | 4.13  |
| AT5G06860 | PGIP1     | polygalacturonase inhibitor 1                                                 | + | + | - |   | 2.63 | 2.47  | 2.2   |
| AT4G08870 | ARGAH2    | arginase///arginine amidohydrolase                                            | + | - | - |   | 2.61 | -0.19 | 1.03  |
| AT5G54860 | AT5G54860 | probable folate-biopterin transporter 4                                       | - | + | - |   | 2.61 | 4.11  | 3.16  |
| AT3G55980 | SZF1      | salt-inducible zinc finger 1                                                  | + | - | + |   | 2.61 | 2.6   | 2.92  |
| AT5G24780 | VSP1      | vegetative storage protein 1///vegetative storage protein 2                   | + | - | - |   | 2.59 | 0.38  | -1.93 |
| AT3G23110 | RLP37     | receptor like protein 38///receptor like protein 37                           | + | - | - |   | 2.59 | 4.28  | 5.37  |
| AT3G13950 | AT3G13950 | hypothetical protein                                                          | + | + | + |   | 2.58 | 4.51  | 5.34  |
| AT4G14400 | ACD6      | protein accelerated cell death 6                                              | + | + | - |   | 2.58 | 3.32  | 3.24  |
| AT1G73800 |           | protein SAR Deficient 1                                                       | + | + | + |   | 2.58 | 4.17  | 4.3   |
| AT5G24210 | AT5G24210 | lipase class 3 family protein                                                 | - | + | - |   | 2.57 | 3.98  | 4.56  |
| AT1G05575 | AT1G05575 | hypothetical protein                                                          | + | - | + |   | 2.57 | 2.81  | 1.94  |
| AT5G39580 | AT5G39580 | peroxidase 62                                                                 | + | - | - | A |      | 3.2   | 3.55  |
| AT3G13790 | ATBFRUCT1 | beta-fructofuranosidase, insoluble isoenzyme CWINV1                           | + | - | + |   | 2.5  | 3.24  | 3.65  |

|           |           |                                                                            |   |   |   |      |       |      |
|-----------|-----------|----------------------------------------------------------------------------|---|---|---|------|-------|------|
| AT5G64120 | PRX71     | peroxidase 71                                                              | + | + | + | 2.49 | 2.5   | 2.96 |
| AT5G13930 | TT4       | chalcone synthase                                                          | - | - | + | 2.48 | 0.47  | 2.87 |
| AT1G72940 | AT1G72940 | Toll-Interleukin-Resistance domain-containing protein                      | + | - | - | 2.47 | 1.99  | 2.11 |
| AT3G12500 | HCHIB     | basic chitinase B                                                          | + | - | - | 2.46 | 3.18  | 3.84 |
| AT3G48080 | AT3G48080 | lipase class 3 family protein / disease resistance protein-related protein | - | + | - | 2.45 | 4.29  | 4.59 |
| AT5G01540 | LECRKA4.1 | lectin receptor kinase A4.1                                                | + | + | - | 2.45 | 3     | 4.39 |
| AT3G14990 | DJ1A      | protein DJ-1-like A                                                        | - | - | + | 2.43 | 3.35  | 3.67 |
| AT1G19180 | JAZ1      | protein TIFY 10A                                                           | + | + | - | 2.43 | 2.66  | 2.09 |
| AT2G20560 | AT2G20560 | DNAJ heat shock family protein                                             | - | - | + | 2.4  | 2.75  | 3.31 |
| AT2G39200 | ML012     | ML0-like protein                                                           | + | - | + | 2.4  | A     | 1.75 |
| AT2G26020 | PDF1.2b   | putative defensin-like protein                                             | + | - | - | 2.4  | 2.35  | 1.61 |
| AT1G09080 | BIP3      | probable mediator of RNA polymerase II transcription subunit 37b           | - | - | + | 2.39 | 4.92  | 7.02 |
| AT1G01560 | MPK11     | mitogen-activated protein kinase 11                                        | + | + | + | 2.38 | 3.93  | 3.67 |
| AT1G66880 | AT1G66880 | serine/threonine protein kinase                                            | + | + | + | 2.38 | 3.76  | 3.53 |
| AT4G17500 | ERF-1     | ethylene-responsive transcription factor 1A                                | + | - | + | 2.37 | 3.28  | 2.91 |
| AT1G72060 | AT1G72060 | serine-type endopeptidase inhibitor                                        | - | - | + | 2.36 | 1.99  | 4.26 |
| AT4G10500 | AT4G10500 | oxidoreductase, 2OG-Fe(II) oxygenase family protein                        | - | + | - | A    | 4.47  | 9.03 |
| AT2G29350 | SAG13     | senescence-associated protein 13                                           | + | - | - | 2.35 | 4.25  | 6.93 |
| AT3G61190 | BAP1      | BON association protein 1                                                  | + | + | - | 2.33 | 4.3   | 4.62 |
| AT1G01060 | LHY       | myb-related putative transcription factor                                  | - | + | - | 2.31 | -3.42 | 6.97 |
| AT3G11010 | RLP34     | receptor like protein 53///receptor like protein 34                        | + | - | - | 2.3  | 4.06  | 4.98 |
| AT1G10340 | AT1G10340 | ankyrin repeat-containing protein                                          | - | + | - | 2.3  | 4.56  | 5.21 |
| AT4G21400 | CRK28     | cysteine-rich receptor-like protein kinase 28                              | + | - | + | 2.3  | 3.78  | 2.99 |
| AT4G18880 | HSF A4A   | heat stress transcription factor A-4a                                      | + | - | + | 2.29 | 3.07  | 2.03 |
| AT3G57700 | AT3G57700 | putative protein kinase                                                    | + | + | + | 2.29 | 2.82  | 2.9  |
| AT5G66890 | AT5G66890 | putative disease resistance protein                                        | + | - | - | A    | 4.12  | 3.43 |
| AT3G47480 | AT3G47480 | putative calcium-binding protein CML47                                     | + | + | + | 2.27 | 4.47  | 4.95 |
| AT1G08050 | AT1G08050 | C3HC4-type RING finger-containing protein                                  | + | + | - | 2.27 | 4.56  | 4.44 |
| AT3G25780 | AOC3      | allene oxide cyclase 3                                                     | + | + | - | 2.24 | 3.99  | 3.28 |
| AT3G52400 | SYP122    | syntaxin-122                                                               | + | + | + | 2.22 | 3.24  | 2.96 |
| AT1G51790 | AT1G51790 | leucine-rich repeat protein kinase-like protein                            | + | - | + | 2.21 | 1.99  | 1.45 |
| AT2G40140 | CZF1      | zinc finger CCCH domain-containing protein 29                              | + | + | + | 2.19 | 3.59  | 3.18 |
| AT4G33070 | PDC1      | pyruvate decarboxylase                                                     | - | + | + | 2.18 | 6.08  | A    |
| AT2G46400 | WRKY46    | putative WRKY transcription factor 46                                      | - | + | - | 2.18 | 4.52  | 4.91 |
| AT3G54420 | EP3       | chitinase class IV                                                         | + | - | + | 2.17 | 3.28  | 3.72 |
| AT4G39030 | EDS5      | enhanced disease susceptibility 5                                          | + | + | + | 2.17 | 4.93  | 4.13 |
| AT4G23320 | CRK24     | cysteine-rich receptor-like protein kinase 24                              | + | - | - | 2.17 | 2.97  | 3.65 |
| AT5G46050 | PTR3      | peptide transporter 3                                                      | + | + | - | 2.16 | 3.01  | 3.87 |
| AT2G44840 | ERF13     | ethylene-responsive transcription factor 13                                | + | + | + | 2.16 | 2.41  | 2.46 |
| AT4G11280 | ACS6      | l-aminocyclopropane-l-carboxylate synthase 6                               | - | - | + | 2.15 | 2.28  | 2.38 |
| AT4G12720 | NUDT7     | nudix hydrolase 7                                                          | + | + | + | 2.15 | 3.1   | 2.97 |
| AT3G56400 | WRKY70    | WRKY transcription factor 70                                               | + | + | + | 2.15 | 3.76  | 3.74 |
| AT1G66550 | WRKY67    | putative WRKY transcription factor 67                                      | + | - | - | A    | 5.64  | A    |
| AT2G47130 | SDR3      | short-chain dehydrogenase reductase 3a                                     | + | - | - | 2.15 | 4.18  | 3.83 |
| AT1G18570 | MYB51     | myb domain protein 51                                                      | + | + | + | 2.14 | 2.63  | 1.02 |
| AT1G71390 | RLP11     | receptor like protein 11                                                   | + | + | - | A    | A     | 4.29 |

|           |           |                                                                                     |   |   |   |   |      |       |
|-----------|-----------|-------------------------------------------------------------------------------------|---|---|---|---|------|-------|
| AT1G21520 | AT1G21520 | hypothetical protein                                                                | - | - | + | A | 5.79 | 6.46  |
| AT2G39210 | AT2G39210 | major facilitator protein                                                           | + | - | - |   | 2.12 | 2.76  |
| AT4G39890 | RABH1c    | Ras-related protein RABH1c                                                          | + | + | - |   | 2.11 | 2.53  |
| AT1G17745 | PGDH      | D-3-phosphoglycerate dehydrogenase                                                  | + | - | - |   | 2.11 | 3.93  |
| AT5G38900 | AT5G38900 | Thioredoxin superfamily protein                                                     | + | - | - |   | 2.1  | 5.38  |
| AT5G44420 | PDF1.2    | ethylene- and jasmonate-responsive plant defensin                                   | + | + | - |   | 2.09 | 2.22  |
| AT2G30250 | WRKY25    | WRKY transcription factor 25                                                        | + | + | - |   | 2.09 | 2.69  |
| AT1G51660 | MKK4      | mitogen-activated protein kinase kinase 4                                           | + | + | + |   | 2.08 | 3.18  |
| AT3G04720 | PR4       | pathogenesis-related 4                                                              | + | - | - |   | 2.08 | 2.16  |
| AT2G40750 | WRKY54    | WRKY DNA-binding protein 54                                                         | + | + | + |   | 2.06 | 3.35  |
| AT1G30900 | VSR6      | vacuolar sorting receptor 6                                                         | - | + | - |   | 2.06 | 3.72  |
| AT5G24530 | DMR6      | downy mildew resistance 6 protein / oxidoreductase                                  | + | + | + |   | 2.05 | 3.07  |
| AT4G08850 | AT4G08850 | probable LRR receptor-like serine/threonine-protein kinase                          | + | - | - |   | 2.04 | 2.76  |
| AT1G52410 | TSA1      | TSK-associating protein 1                                                           | + | - | - |   | 2.03 | 1.09  |
| AT1G25400 | AT1G25400 | hypothetical protein                                                                | + | + | - |   | 2.03 | 2.02  |
| AT2G32680 | RLP23     | receptor like protein 23                                                            | + | + | + |   | 2.03 | 3.34  |
| AT2G21640 | AT2G21640 | hypothetical protein                                                                | - | - | + |   | 2.01 | 3.45  |
| AT3G52430 | PAD4      | protein PHYTOALEXIN DEFICIENT 4                                                     | + | + | + |   | 2    | 3.86  |
| AT3G44400 | AT3G44400 | TIR-NBS-LRR class disease resistance protein                                        | + | - | - |   | 1.98 | 2.73  |
| AT3G22160 | AT3G22160 | VQ motif-containing protein                                                         | - | + | - |   | 1.98 | 3.39  |
| AT5G64510 | TIN1      | hypothetical protein                                                                | - | - | + |   | 1.98 | 3.63  |
| AT1G52040 | MBP1      | myrosinase-binding protein 1/myrosinase-binding protein 2                           | + | - | - |   | 1.97 | -0.4  |
| AT4G01700 | AT4G01700 | Chitinase family protein                                                            | + | - | - |   | 1.96 | 3.07  |
| AT5G61600 | ERF104    | ethylene-responsive transcription factor ERF104                                     | + | - | - |   | 1.96 | 2.38  |
| AT4G03450 | AT4G03450 | ankyrin repeat-containing protein                                                   | + | + | + |   | 1.96 | 3.84  |
| AT4G12400 | Hop3      | carboxylate clamp-tetratricopeptide repeat protein                                  | - | - | + |   | 1.94 | 3.07  |
| AT1G61360 | AT1G61360 | G-type lectin S-receptor-like serine/threonine-protein kinase                       | + | - | + |   | 1.93 | 2.01  |
| AT1G33960 | AIG1      | protein AIG1                                                                        | + | + | - |   | 1.93 | 6.98  |
| AT4G38560 | AT4G38560 | phospholipase like protein (PEARLI 4)                                               | - | + | - |   | 1.93 | 2.77  |
| AT1G15520 | ABCG40    | ABC transporter G family member 40                                                  | + | + | + |   | 1.92 | 4.76  |
| AT5G25440 | AT5G25440 | protein kinase family protein                                                       | + | + | - |   | 1.92 | 3.13  |
| AT4G13900 | RLP50     | receptor like protein 50                                                            | + | - | - |   | 1.91 | 2.02  |
| AT2G37710 | RLK       | receptor lectin kinase                                                              | + | + | + |   | 1.9  | 2.78  |
| AT3G16720 | ATL2      | RING-H2 finger protein ATL2                                                         | + | + | + |   | 1.9  | 2.43  |
| AT1G62300 | WRKY6     | WRKY transcription factor 6                                                         | + | - | + |   | 1.89 | 2.9   |
| AT3G48090 | EDS1      | enhanced disease susceptibility 1 protein                                           | + | + | + |   | 1.88 | 4.07  |
| AT3G18830 | PMT5      | polyol transporter 5                                                                | + | - | - |   | 1.88 | 1.77  |
| AT1G02450 | NIMIN1    | protein NIMI-INTERACTING 1                                                          | + | + | + |   | 1.87 | 4.26  |
| AT1G73805 | SARD1     | protein SAR Deficient 1                                                             | + | + | + |   | 1.86 | 3.82  |
| AT3G02840 | AT3G02840 | hypothetical protein                                                                | + | - | - |   | 1.84 | 2.88  |
| AT2G31880 | SOBIR1    | leucine-rich repeat receptor-like serine/threonine/tyrosine-protein kinase SOBIR1   | + | - | - |   | 1.84 | 3.47  |
| AT4G04220 | RLP46     | receptor like protein 46                                                            | + | + | + |   | 1.84 | 2.71  |
| AT5G63490 | AT5G63490 | CBS / octicosapeptide/Phox/Bem1 domain-containing protein                           | - | + | - |   | 1.83 | 1.74  |
| AT2G33380 | RD20      | caleosin 3                                                                          | - | + | - |   | 1.82 | -0.75 |
| AT2G19190 | FRK1      | FLG22-induced receptor-like kinase 1                                                | + | + | + |   | 1.81 | 4.49  |
| AT5G38000 | AT5G38000 | zinc-binding dehydrogenase family protein/zinc-binding dehydrogenase family protein | - | - | + | A | 1.86 | A     |

|           |           |                                                                                  |   |   |   |   |      |       |       |
|-----------|-----------|----------------------------------------------------------------------------------|---|---|---|---|------|-------|-------|
| AT3G45860 | CRK4      | cysteine-rich receptor-like protein kinase 4                                     | + | + | - |   | 1.79 | 3.33  | 4.41  |
| AT2G02310 | PP2-B6    | putative F-box protein PP2-B6                                                    | + | - | - | A |      | 2.94  | 2.68  |
| AT2G46830 | CCA1      | protein CCA1                                                                     | - | + | - |   | 1.77 | -6.44 | 4.25  |
| AT2G17040 | NAC036    | NAC domain containing protein 36                                                 | + | - | - |   | 1.77 | 2.4   | 3.95  |
| AT1G56650 | PAP1      | transcription factor MYB75                                                       | + | - | - |   | 1.76 | -0.7  | 0.2   |
| AT5G17300 | RVE1      | myb family transcription factor                                                  | - | + | - |   | 1.76 | A     | 4.89  |
| AT3G57260 | BGL2      | glucan endo-1,3-beta-D-glucosidase                                               | + | + | + |   | 1.75 | 3.24  | 6.37  |
| AT2G13790 | SERK4     | somatic embryogenesis receptor kinase 5//somatic embryogenesis receptor kinase 4 | + | - | - |   | 1.74 | 2.88  | 2.89  |
| AT2G25735 | AT2G25735 | hypothetical protein                                                             | + | - | + |   | 1.74 | 1.72  | 0.42  |
| AT1G67800 | AT1G67800 | Copine (Calcium-dependent phospholipid-binding protein) family protein           | + | + | - |   | 1.73 | 2.55  | 2.3   |
| AT1G23710 | AT1G23710 | hypothetical protein                                                             | + | - | + |   | 1.72 | 2.42  | 2.79  |
| AT1G03770 | RING1B    | putative E3 ubiquitin-protein ligase RING1b                                      | - | - | + | A | A    |       | 1.22  |
| AT2G39650 | AT2G39650 | hypothetical protein                                                             | + | - | + |   | 1.72 | 2.37  | 2.39  |
| AT3G09020 | AT3G09020 | alpha 1,4-glycosyltransferase family protein                                     | + | + | + |   | 1.71 | 2.07  | 1.46  |
| AT2G41010 | CAMB25    | calmodulin binding protein 25                                                    | - | + | - |   | 1.71 | 1.89  | 3.27  |
| AT3G11840 | PUB24     | E3 ubiquitin-protein ligase PUB24                                                | + | + | + |   | 1.69 | 2.77  | 2.85  |
| AT5G60900 | RLK1      | receptor-like protein kinase 1                                                   | + | + | + |   | 1.69 | 2.72  | 3.1   |
| AT3G11820 | SY121     | syntaxin-121                                                                     | + | + | + |   | 1.66 | 2.6   | 2.12  |
| AT5G39610 | NAC6      | NAC-domain transcription factor                                                  | - | - | + |   | 1.66 | 1.1   | 1.74  |
| AT3G09600 | RVE8      | MYB-like transcription factor                                                    | - | + | - |   | 1.66 | 0.14  | 4.62  |
| AT3G02000 | ROXY1     | glutaredoxin-C7                                                                  | - | + | - |   | 1.66 | 1.33  | 0.92  |
| AT5G05190 | AT5G05190 | hypothetical protein                                                             | + | - | + |   | 1.65 | 2.26  | 1.52  |
| AT2G23810 | TET8      | tetraspanin8                                                                     | + | - | - |   | 1.64 | 2.64  | 2.63  |
| AT5G47220 | ERF2      | ethylene-responsive transcription factor 2                                       | + | - | + |   | 1.64 | 2.17  | 0.53  |
| AT3G17790 | PAP17     | purple acid phosphatase 17                                                       | - | - | + |   | 1.62 | 2.45  | 3.53  |
| AT5G47910 | RBOHD     | respiratory burst oxidase-D                                                      | + | - | + |   | 1.62 | 1.54  | 2.05  |
| AT2G34930 | AT2G34930 | disease resistance-like protein/LRR domain-containing protein                    | + | - | - |   | 1.62 | 0.01  | -0.72 |
| AT5G67330 | NRAMP4    | metal transporter Nramp2                                                         | + | - | + |   | 1.62 | 0.62  | 0.69  |
| AT4G37150 | MES9      | methyl esterase 9                                                                | + | - | - |   | 1.62 | A     | 2.61  |
| AT1G76040 | CPK29     | calcium-dependent protein kinase 29                                              | - | + | - |   | 1.61 | 3.28  | 3.24  |
| AT1G51890 | AT1G51890 | probable LRR receptor-like protein kinase                                        | + | + | - |   | 1.6  | 4.62  | 3.86  |
| AT3G50950 | ZAR1      | disease resistance RPP13-like protein 4                                          | + | - | - |   | 1.59 | 2.95  | 2.32  |
| AT3G10500 | NAC053    | NAC domain containing protein 53                                                 | - | - | + |   | 1.59 | 2.68  | 2.25  |
| AT1G76070 | AT1G76070 | hypothetical protein                                                             | + | - | - |   | 1.58 | 1.21  | 1.29  |
| AT3G45640 | MPK3      | mitogen-activated protein kinase 3                                               | + | + | + |   | 1.58 | 2.08  | 1.99  |
| AT1G55690 | AT1G55690 | Sec1p-like phosphatidylinositol transfer family protein                          | - | - | + |   | 1.58 | 1.17  | 1.2   |
| AT1G52400 | BGLU18    | beta glucosidase 18                                                              | + | - | - |   | 1.58 | 0.24  | -0.08 |
| AT5G58940 | CRCK1     | calmodulin-binding receptor-like cytoplasmic kinase 1                            | - | + | + | A |      | 2.22  | 2.97  |
| AT3G28930 | AIG2      | avrRpt2-induced protein AIG2                                                     | + | + | + |   | 1.56 | 2.45  | 1.26  |
| AT5G62520 | SR05      | probable inactive poly [ADP-ribose] polymerase SR05                              | - | - | + | A |      | 1.82  | A     |
| AT2G35930 | PUB23     | E3 ubiquitin-protein ligase PUB23                                                | + | + | + |   | 1.55 | 2.29  | 1.37  |
| AT1G19640 | JMT       | jasmonic acid carboxyl methyltransferase                                         | - | + | - |   | 1.55 | 0.28  | 0.85  |
| AT1G17600 | AT1G17600 | TIR-NBS-LRR class disease resistance protein                                     | + | + | - | A |      | 3.22  | 3.2   |
| AT1G10170 | NFXL1     | NF-X1-type zinc finger protein NFXL1                                             | + | + | + |   | 1.54 | 1.85  | 0.85  |
| AT3G19580 | ZF2       | zinc-finger protein 2                                                            | + | - | + |   | 1.53 | 2.51  | 2.67  |
| AT5G42050 | AT5G42050 | DCD (Development and Cell Death) domain protein                                  | + | + | - |   | 1.52 | 2.49  | 3.2   |



|           |           |                                                                                               |   |   |   |      |      |       |
|-----------|-----------|-----------------------------------------------------------------------------------------------|---|---|---|------|------|-------|
| AT1G42990 | BZIP60    | bZIP transcription factor 60                                                                  | + | + | + | 1.52 | 2.13 | 2.46  |
| AT5G48380 | BIR1      | BAK1-interacting receptor-like kinase BIR1                                                    | + | + | - | 1.52 | 3.13 | 2.83  |
| AT4G39830 | AT4G39830 | putative L-ascorbate oxidase                                                                  | - | + | - | 1.52 | 5.07 | 4.74  |
| AT2G46270 | GBF3      | G-box binding factor 3                                                                        | - | - | + | 1.51 | 1.95 | 3.81  |
| AT5G12020 | HSP17.6II | class II heat shock protein 17.6                                                              | - | - | + | A    | A    | 1.25  |
| AT1G45145 | TRX5      | thioredoxin H5                                                                                | + | - | + | 1.49 | 2.89 | 3.76  |
| AT3G08720 | S6K2      | serine/threonine protein kinase 2                                                             | - | + | - | 1.49 | 2.17 | 3.3   |
| AT2G02930 | GSTF3     | glutathione S-transferase F2///glutathione S-transferase F3                                   | + | - | - | 1.49 | 3.06 | 3.34  |
| AT2G27310 | AT2G27310 | F-box protein                                                                                 | + | - | + | 1.48 | 2.18 | 1.39  |
| AT3G09830 | AT3G09830 | protein kinase family protein                                                                 | + | + | - | 1.48 | 1.83 | 2     |
| AT1G50180 | AT1G50180 | NB-ARC domain-containing disease resistance protein                                           | + | - | - | 1.48 | A    | 1.74  |
| AT1G70530 | CRK3      | cysteine-rich receptor-like protein kinase 3                                                  | + | - | - | 1.47 | 1.52 | 0.14  |
| AT4G24160 | AT4G24160 | lysophosphatidic acid acyltransferase                                                         | + | - | - | 1.47 | 1.83 | 1.32  |
| AT5G48570 | ROF2      | peptidyl-prolyl cis-trans isomerase FKBP65                                                    | - | - | + | 1.46 | 2.22 | 0.96  |
| AT5G61890 | AT5G61890 | ethylene-responsive transcription factor ERF114                                               | + | - | - | 1.46 | 0.8  | A     |
| AT1G28370 | ERF11     | ethylene-responsive transcription factor 11                                                   | + | + | - | 1.46 | 1.6  | 1.82  |
| AT5G02490 | Hsp70-2   | heat shock protein 70                                                                         | - | + | + | 1.46 | 4.3  | 3.27  |
| AT4G02410 | LPK1      | L-type lectin-like protein kinase 1                                                           | + | + | - | 1.45 | 1.66 | 1.55  |
| AT5G61900 | BON1      | copine-like protein BONZAI 1                                                                  | + | + | - | 1.45 | 2.95 | 2.54  |
| AT4G34150 | AT4G34150 | calcium-dependent lipid-binding domain-containing protein                                     | + | - | - | 1.44 | 2.28 | 2.5   |
| AT5G47230 | ERF5      | ethylene-responsive transcription factor 5                                                    | + | - | + | 1.44 | 0.52 | -0.74 |
| AT5G45110 | NPR3      | NPR1-like protein 3                                                                           | + | + | - | 1.44 | 2.87 | 2.53  |
| AT1G14360 | UTR3      | UDP-galactose transporter 3                                                                   | - | - | + | 1.44 | 2.28 | 1.7   |
| AT4G11850 | PLDGAMMA1 | phospholipase D gamma 1                                                                       | + | - | + | 1.43 | 2.4  | 1.8   |
| AT4G13510 | AMT1;1    | ammonium transporter 1;1                                                                      | + | + | + | 1.43 | 3.36 | 2.46  |
| AT4G34710 | ADC2      | arginine decarboxylase 2                                                                      | - | + | + | 1.43 | 1.17 | 1.6   |
| AT3G28340 | GATL10    | putative galacturonosyltransferase-like 10                                                    | - | - | + | 1.42 | 2.85 | 2.46  |
| AT5G46520 | VICTR     | TIR-NBS-LRR protein VICTR                                                                     | + | - | - | 1.42 | 2.4  | 1.87  |
| AT4G31800 | WRKY18    | WRKY DNA-binding protein 18                                                                   | + | + | - | 1.41 | 4.18 | 3.57  |
| AT1G24150 | FH4       | formin-like protein 4                                                                         | - | + | - | 1.4  | 2.12 | 2.22  |
| AT1G66160 | CMPG1     | U-box domain-containing protein                                                               | + | - | + | 1.4  | 0.63 | 1.8   |
| AT5G16970 | AER       | 2-alkenal reductase                                                                           | - | - | + | 1.4  | 0.98 | 0.43  |
| AT5G44070 | CAD1      | phytochelatin synthase 1                                                                      | + | + | + | 1.39 | 2.04 | 1.21  |
| AT3G04210 | AT3G04210 | TIR-NBS class disease resistance protein                                                      | + | - | - | 1.39 | 1.63 | 1.43  |
| AT5G51190 | AT5G51190 | ethylene-responsive transcription factor ERF105                                               | + | - | + | 1.38 | 1.06 | 0.82  |
| AT1G20310 | AT1G20310 | hypothetical protein                                                                          | - | + | - | 1.38 | 1.83 | 1.71  |
| AT5G43580 | UPI       | Serine protease inhibitor, potato inhibitor I-type family protein                             | + | - | - | A    | A    | 1.53  |
| AT4G38550 | AT4G38550 | phospholipase like protein (PEARLI 4) family                                                  | + | - | - | 1.37 | 1.88 | 0.88  |
| AT2G38290 | AMT2      | ammonium transporter 2                                                                        | + | + | + | 1.37 | 2.11 | 1.19  |
| AT1G72930 | TIR       | toll/interleukin-1 receptor-like protein///Toll-Interleukin-Resistance domain-containing prot | + | - | - | 1.37 | 1.05 | 1.45  |
| AT1G76970 | AT1G76970 | Target of Myb protein 1                                                                       | + | + | - | 1.37 | 2.57 | 2.66  |
| AT1G17860 | AT1G17860 | kunitz type trypsin and protease inhibitor domain-containing protein                          | - | - | + | 1.36 | 1.37 | 0.48  |
| AT2G02220 | PSKR1     | phytosulfokin receptor 1                                                                      | + | - | - | 1.36 | 1.74 | 1.52  |
| AT5G06960 | OBF5      | OCS-element binding factor 5                                                                  | + | + | + | 1.35 | 1.35 | 2.18  |
| AT1G70690 | HWI1      | plasmodesmata-located protein 5                                                               | + | - | - | 1.35 | 3.05 | 4.12  |
| AT5G04720 | ADR1-L2   | ADR1-like 2 protein                                                                           | + | + | - | 1.35 | 2.52 | 2.78  |

|           |           |                                                         |   |   |   |      |       |       |
|-----------|-----------|---------------------------------------------------------|---|---|---|------|-------|-------|
| AT2G01830 | WOL       | histidine kinase                                        | + | - | - | 1.34 | 1.48  | 0.2   |
| AT3G44260 | CAF1a     | putative CCR4-associated factor 1                       | + | - | - | 1.34 | 1.85  | 1.63  |
| AT1G71220 | EBS1      | UDP-glucose:glycoprotein glucosyltransferase            | + | + | - | 1.34 | 2.06  | 1.42  |
| AT5G09440 | EXL4      | protein exordium like 4                                 | + | - | - | 1.33 | 0.68  | 1.69  |
| AT2G38860 | YLS5      | protease I (pfpI)-like protein YLS5                     | + | - | - | 1.33 | 2.92  | 2.1   |
| AT5G22060 | J2        | chaperone protein dnaJ 2                                | - | - | + | 1.32 | 2.73  | 2.37  |
| AT3G02150 | PTF1      | transcription factor TCP13                              | + | - | - | 1.32 | 0.9   | 1.26  |
| AT4G16660 | AT4G16660 | heat shock protein 70                                   | - | - | + | 1.32 | 2.63  | 2.01  |
| AT1G19300 | PARVUS    | putative galacturonosyltransferase-like 1               | - | + | - | 1.32 | 2.21  | 1.66  |
| AT2G15080 | RLP19     | receptor like protein 19                                | + | + | + | 1.32 | 1.4   | 2.07  |
| AT4G23570 | SGT1A     | phosphatase SGT1a                                       | + | - | - | 1.31 | 2.22  | 1.96  |
| AT1G74710 | EDS16     | Isochorismate synthase 1                                | + | + | + | 1.31 | 3.56  | 3.64  |
| AT1G22400 | UGT85A1   | UDP-glycosyltransferase 85A1                            | - | + | - | 1.31 | 3     | 2.31  |
| AT4G34390 | XLG2      | extra-large GTP-binding protein 2                       | + | + | - | 1.31 | 2.65  | 2.72  |
| AT1G48000 | MYB112    | myb domain protein 112                                  | - | + | - | A    | A     | 2.58  |
| AT4G37640 | ACA2      | calcium-transporting ATPase 2                           | + | + | - | 1.31 | 2.74  | 2.35  |
| AT5G22250 | CAF1b     | CCR4-associated factor 1B                               | + | - | + | 1.31 | 2.09  | 1.27  |
| AT1G03850 | GRXS13    | glutaredoxin ATGRXS13                                   | + | - | - | 1.3  | 3.2   | 2.06  |
| AT5G61560 | AT5G61560 | U-box domain-containing protein 51                      | + | - | + | 1.29 | 2.01  | 1.59  |
| AT2G30770 | CYP71A13  | cytochrome P450, family 71, subfamily A, polypeptide 13 | + | + | + | 1.29 | 5.45  | 4.97  |
| AT5G03210 | DIP2      | hypothetical protein                                    | + | - | - | 1.29 | 1.39  | 1.77  |
| AT4G36150 | AT4G36150 | TIR-NBS-LRR class disease resistance protein            | + | + | + | 1.29 | 2.2   | 1.63  |
| AT5G26030 | FC1       | ferrochelatase 1                                        | + | - | + | 1.28 | 1.63  | 1.73  |
| AT5G47070 | AT5G47070 | protein kinase family protein                           | - | + | - | 1.28 | 2.11  | 2.15  |
| AT5G42650 | AOS       | allene oxide synthase                                   | + | + | + | 1.28 | -0.79 | -1.58 |
| AT2G47730 | GSTF8     | glutathione S-transferase phi 8                         | + | - | - | 1.28 | 2.19  | 1.48  |
| AT3G02800 | PFA-DSP3  | atypical dual-specificity phosphatase                   | - | - | + | 1.27 | 1.68  | 1.17  |
| AT3G46710 | AT3G46710 | putative disease resistance RPP13-like protein 2        | + | - | - | A    | A     | 1.09  |
| AT4G31500 | CYP83B1   | cytochrome P450 83B1                                    | + | - | - | 1.27 | 1.92  | 0.87  |
| AT5G10760 | AT5G10760 | aspartyl protease family protein                        | + | - | - | 1.27 | 2.9   | 3.73  |
| AT2G22330 | CYP79B3   | tryptophan N-hydroxylase 2                              | + | - | - | 1.25 | 0.64  | 0.29  |
| AT3G46600 | AT3G46600 | scarecrow-like protein 30                               | + | - | + | 1.23 | 1.8   | 0.88  |
| AT4G23130 | CRK5      | cysteine-rich receptor-like protein kinase 5            | + | + | - | 1.23 | 1.26  | 0.63  |
| AT4G26070 | MEK1      | mitogen-activated protein kinase kinase 1               | + | + | + | 1.22 | 2.12  | 1.7   |
| AT2G34940 | VSR5      | vacuolar-sorting receptor 5                             | - | + | - | 1.21 | 2.24  | 2.34  |
| AT1G07000 | EX070B2   | exocyst subunit exo70 family protein B2                 | + | + | - | 1.21 | 2.64  | 2.93  |
| AT3G54640 | TSA1      | tryptophan synthase alpha chain                         | + | + | + | 1.21 | 1.48  | 0.57  |
| AT4G26090 | RPS2      | disease resistance protein RPS2                         | + | + | + | 1.2  | 2.02  | 1.36  |
| AT5G53120 | SPDS3     | Spermine synthase                                       | + | - | - | 1.2  | 1.33  | 2.21  |
| AT3G17700 | CNBT1     | cyclic nucleotide-binding transporter 1                 | + | + | + | 1.2  | 2.58  | 2.04  |
| AT1G80820 | CCR2      | cinnamoyl-CoA reductase                                 | + | - | - | 1.2  | 0.66  | 2.53  |
| AT1G77920 | TGA7      | transcription factor TGA7                               | + | - | - | 1.19 | 1.28  | 0.93  |
| AT1G64070 | RLM1      | TIR-NBS-LRR class disease resistance protein            | + | - | - | A    | 1.3   | A     |
| AT5G06870 | PGIP2     | polygalacturonase inhibitor 2                           | + | + | + | 1.19 | -0.45 | -0.13 |
| AT3G20470 | GRP5      | glycine-rich protein 5                                  | - | + | - | 1.19 | 0.01  | -0.88 |
| AT5G45000 | AT5G45000 | TIR-NBS-LRR class disease resistance protein            | + | - | - | 1.18 | 3.66  | 2.89  |



|           |                               |                                                                                               |   |   |   |   |   |      |       |       |
|-----------|-------------------------------|-----------------------------------------------------------------------------------------------|---|---|---|---|---|------|-------|-------|
| AT1G56540 | AT1G56540                     | TIR-NBS-LRR class disease resistance protein                                                  | + | - | - | A | A |      | 2.37  |       |
| AT2G04450 | NUDT6                         | nudix hydrolase 6                                                                             | + | + | + |   |   | 1.18 | 5.6   | 5.49  |
| AT1G19670 | CLH1                          | chlorophyllase 1                                                                              | + | + | + |   |   | 1.18 | -0.05 | -0.11 |
| AT4G38540 | AT4G38540                     | FAD/NAD(P)-binding oxidoreductase family protein                                              | + | - | - |   |   | 1.18 | 2.77  | 2.09  |
| AT1G08450 | CRT3                          | calreticulin-3                                                                                | + | + | - |   |   | 1.17 | 2.54  | 3.43  |
| AT1G08930 | ERD6                          | sugar transporter ERD6                                                                        | + | - | - |   |   | 1.17 | 1.71  | 1.08  |
| AT1G79680 | WAKL10                        | wall-associated receptor kinase-like 10                                                       | + | + | - |   |   | 1.16 | 2.28  | 1.07  |
| AT3G10040 | AT3G10040                     | sequence-specific DNA binding transcription factor                                            | - | + | + |   |   | 1.16 | 1.05  | 0.06  |
| AT1G32640 | MYC2                          | transcription factor MYC2                                                                     | + | + | + |   |   | 1.16 | 0.38  | 1.21  |
| AT5G63970 | RGLG3                         | ring domain ligase 3                                                                          | + | - | - |   |   | 1.15 | 0.85  | 0.77  |
| AT1G74440 | AT1G74440                     | hypothetical protein                                                                          | + | - | - |   |   | 1.14 | 2.04  | 2.67  |
| AT3G09610 | MYB-like transcription factor |                                                                                               | - | + | - |   |   | 1.14 | -2.27 | 3.55  |
| AT4G39950 | CYP79B2                       | tryptophan N-monooxygenase 1                                                                  | + | - | - |   |   | 1.14 | 1.73  | 1.05  |
| AT3G57330 | ACA11                         | putative calcium-transporting ATPase 11                                                       | + | - | - |   |   | 1.13 | 1.57  | 1.62  |
| AT1G25390 | AT1G25390                     | protein kinase-like protein                                                                   | + | - | - |   |   | 1.13 | 1.76  | 1.4   |
| AT1G14200 | AT1G14200                     | RING finger domain-containing protein                                                         | - | - | + |   |   | 1.13 | 1.42  | 1.45  |
| AT1G59870 | PEN3                          | ABC transporter G family member 36                                                            | + | + | + |   |   | 1.13 | 1.56  | 0.65  |
| AT1G61560 | ML06                          | MLO-like protein 6                                                                            | + | - | - |   |   | 1.12 | 0.5   | 1.04  |
| AT4G11190 | AT4G11190                     | disease resistance-responsive, dirigent domain-containing protein                             | + | - | - |   |   | 1.12 | -0.25 | -1.12 |
| AT1G04980 | PDIL2-2                       | protein disulfide-isomerase like 2-2                                                          | - | - | + |   |   | 1.12 | 2.91  | 2.44  |
| AT4G36500 | AT4G36500                     | hypothetical protein                                                                          | + | + | - |   |   | 1.12 | 0.96  | 0.42  |
| AT5G24660 | LSU2                          | response to low sulfur 2                                                                      | + | - | - |   |   | 1.12 | 0.31  | 2.12  |
| AT5G06320 | NHL3                          | NDR1/HIN1-Like protein 3                                                                      | + | - | - |   |   | 1.12 | 1.77  | 2.21  |
| AT1G54840 | AT1G54840                     | alpha-crystallin domain of heat shock protein-containing protein                              | - | - | + |   |   | 1.12 | 1.69  | A     |
| AT2G30020 | AT2G30020                     | putative protein phosphatase 2C 53///putative protein phosphatase 2C-like protein 45///putati | + | - | - |   |   | 1.12 | 1.82  | 1.98  |
| AT3G50260 | CEJ1                          | ethylene-responsive transcription factor ERF011                                               | + | - | + |   |   | 1.12 | 2.32  | 1.36  |
| AT4G04500 | CRK37                         | cysteine-rich receptor-like protein kinase 37                                                 | - | + | - |   |   | 1.11 | 4.36  | 5.58  |
| AT5G62570 | AT5G62570                     | calmodulin binding protein-like protein                                                       | + | - | - |   |   | 1.11 | 0.9   | 2.12  |
| AT1G77500 | AT1G77500                     | hypothetical protein                                                                          | + | - | - |   |   | 1.11 | 1.97  | 1.5   |
| AT3G16890 | PPR40                         | pentatricopeptide repeat-containing protein                                                   | - | - | + |   |   | 1.1  | A     | A     |
| AT4G19660 | NPR4                          | NPR1-like protein 4                                                                           | + | + | - |   |   | 1.1  | 1.64  | 1.16  |
| AT4G28400 | AT4G28400                     | putative protein phosphatase 2C 58                                                            | + | - | - |   |   | 1.1  | 1.4   | 2.38  |
| AT5G18750 | AT5G18750                     | DNAJ heat shock N-terminal domain-containing protein                                          | - | - | + |   |   | 1.1  | 0.9   | 0.19  |
| AT2G41180 | SIB2                          | VQ motif-containing protein                                                                   | + | - | - |   |   | 1.1  | 1.59  | 0.92  |
| AT5G49520 | WRKY48                        | putative WRKY transcription factor 48                                                         | + | - | + |   | A |      | 1.66  | 2.71  |
| AT5G09590 | MTHSC70-2                     | mitochondrial HS070 2                                                                         | - | - | + |   |   | 1.09 | 1.86  | 0.68  |
| AT2G39660 | BIK1                          | serine/threonine-protein kinase BIK1                                                          | + | + | + |   |   | 1.09 | 1.65  | 1.69  |
| AT1G57560 | MYB50                         | myb domain protein 50                                                                         | - | + | - |   |   | 1.09 | 3.87  | 2.76  |
| AT1G19230 | AT1G19230                     | riboflavin synthase-like superfamily protein                                                  | + | - | - |   |   | 1.09 | A     | 0.38  |
| AT4G08480 | MAPKKK9                       | mitogen-activated protein kinase kinase kinase 9                                              | + | - | - |   |   | 1.09 | 1.28  | 1.16  |
| AT1G18380 |                               | probable serine/threonine-protein kinase                                                      | + | - | + |   |   | 1.08 | 1.6   | 0.61  |
| AT3G23240 | ERF1                          | ethylene-responsive transcription factor 1B                                                   | + | - | - |   |   | 1.08 | 1.54  | 1.19  |
| AT1G51620 | AT1G51620                     | protein kinase superfamily protein                                                            | + | - | + |   | A |      | 2.2   | 2.71  |
| AT5G48600 | SMC3                          | structural maintenance of chromosomes protein 4                                               | + | - | - |   |   | 1.08 | 1.7   | 0.69  |
| AT4G31750 | WIN2                          | putative protein phosphatase 2C 59                                                            | + | - | - |   |   | 1.08 | 1.37  | 1.84  |
| AT4G15430 | AT4G15430                     | ERD (early-responsive to dehydration stress) family protein                                   | - | + | - |   |   | 1.08 | 0.17  | 3.06  |

|           |           |                                                                          |   |   |   |      |       |       |
|-----------|-----------|--------------------------------------------------------------------------|---|---|---|------|-------|-------|
| AT3G05200 | ATL6      | E3 ubiquitin-protein ligase ATL6                                         | + | - | + | 1.07 | 1.61  | 1.19  |
| AT1G69260 | AFP1      | ABI five binding protein                                                 | - | + | - | 1.07 | 1.27  | 3.36  |
| AT1G75280 | AT1G75280 | putative Isoflavone reductase                                            | - | - | + | 1.07 | -0.72 | -0.53 |
| AT3G09440 | AT3G09440 | heat shock protein 70-3                                                  | - | - | + | 1.07 | 2.42  | 1.46  |
| AT4G17230 | SCL13     | protein scarecrow-like 13                                                | + | + | + | 1.07 | 1.63  | 0.78  |
| AT1G07630 | PLL5      | putative protein phosphatase 2C                                          | + | + | - | 1.07 | 1.27  | 1.53  |
| AT2G26530 | AR781     | hypothetical protein                                                     | - | + | - | 1.07 | 0.64  | 0.12  |
| AT2G17850 | AT2G17850 | rhodanese-like domain-containing protein 17                              | - | + | + | 1.06 | A     | A     |
| AT2G04430 | NUDT5     | nudix hydrolase 5                                                        | + | + | - | 1.06 | 4.38  | 4.45  |
| AT2G16060 | HB1       | non-symbiotic hemoglobin 1                                               | - | + | + | 1.06 | 4.4   | 2.3   |
| AT5G13190 | GILP      | GSH-induced LITAF domain protein                                         | - | + | - | 1.06 | 2.09  | 2.04  |
| AT5G17990 | TRP1      | anthranilate phosphoribosyltransferase                                   | + | - | - | 1.06 | 1.58  | 1.16  |
| AT4G18010 | IP5PII    | Type I inositol-1,4,5-trisphosphate 5-phosphatase 2                      | + | - | - | 1.05 | 0.89  | 1.62  |
| AT1G18390 | AT1G18390 | probable serine/threonine-protein kinase                                 | + | - | + | 1.05 | 2.33  | 0.55  |
| AT1G73730 | EIL3      | ethylene insensitive 3-like 3 protein                                    | + | + | + | 1.05 | 0.52  | 1.08  |
| AT4G09570 | CPK4      | calcium-dependent protein kinase 4                                       | + | + | - | 1.05 | 1.9   | 1.41  |
| AT2G30550 | AT2G30550 | phospholipase A1-Igamma2                                                 | + | + | - | 1.05 | 2.77  | 2.71  |
| AT5G26860 | LON1      | lon protease 1                                                           | - | - | + | 1.05 | 1.72  | 0.53  |
| AT2G40270 | AT2G40270 | Protein kinase family protein                                            | + | + | - | 1.04 | 1.17  | 2.26  |
| AT4G25390 | AT4G25390 | receptor-like serine/threonine-protein kinase                            | - | + | - | 1.04 | 1.45  | 1.65  |
| AT3G02550 | LBD41     | LOB domain-containing protein 41                                         | - | + | + | 1.04 | 1.48  | -0.14 |
| AT2G17740 | AT2G17740 | cysteine/histidine-rich C1 domain-containing protein                     | + | - | + | 1.04 | 1.55  | A     |
| AT5G17760 | AT5G17760 | P-loop containing nucleoside triphosphate hydrolases superfamily protein | - | + | - | 1.03 | 4.64  | 4.89  |
| AT1G12210 | RFL1      | disease resistance protein RFL1                                          | + | - | - | A    | 2.98  | A     |
| AT2G17720 | P4H5      | prolyl 4-hydroxylase 5                                                   | + | - | + | 1.02 | 2.02  | 1.72  |
| AT4G24190 | SHD       | HSP90-like protein GRP94                                                 | - | - | + | 1.02 | 2.19  | 1.88  |
| AT3G07720 | AT3G07720 | galactose oxidase/kelch repeat-containing protein                        | - | + | - | 1.02 | 1.88  | 2.33  |
| AT1G54100 | ALDH7B4   | aldehyde dehydrogenase 7B4                                               | - | - | + | 1.02 | 0.7   | 0.91  |
| AT3G09350 | Fes1A     | protein Fes1A                                                            | - | - | + | 1    | 1.61  | 1.18  |
| AT5G59550 | RDUF2     | ABA- and drought-induced RING-DUF1117 protein                            | + | - | + | 1    | 1.78  | 1.39  |
| AT2G04400 | AT2G04400 | indole-3-glycerol phosphate synthase                                     | + | - | - | 0.99 | 2.08  | 0.77  |
| AT2G34720 | NF-YA4    | nuclear transcription factor Y subunit A-4                               | - | + | - | 0.98 | -0.73 | 1.64  |
| AT3G45620 | AT3G45620 | DWD motif protein                                                        | - | + | - | 0.98 | 2.35  | 2.5   |
| AT1G64280 | NPR1      | Regulatory protein NPR1                                                  | + | + | + | 0.98 | 1.35  | 1.34  |
| AT1G64610 | AT1G64610 | WD40 domain-containing protein                                           | + | + | + | 0.98 | 2.11  | 2.14  |
| AT4G14220 | RHF1A     | E3 ubiquitin-protein ligase RHF1A                                        | + | + | + | 0.98 | 1.59  | 1.97  |
| AT2G37940 | AtIPCS2   | inositol phosphorylceramide synthase 2                                   | + | - | - | 0.97 | 1.67  | 1.22  |
| AT1G74100 | SOT16     | sulfotransferase 16                                                      | + | - | - | 0.96 | 1.12  | 0.64  |
| AT3G19970 | AT3G19970 | hypothetical protein                                                     | + | + | - | 0.96 | 0.96  | 2.71  |
| AT1G07520 | AT1G07520 | GRAS family transcription factor                                         | + | - | + | 0.96 | 1.3   | 0.94  |
| AT3G24500 | MBF1C     | multiprotein-bridging factor 1c                                          | - | - | + | 0.96 | 2.09  | 2.6   |
| AT5G39020 | AT5G39020 | putative receptor-like protein kinase                                    | + | + | + | 0.95 | 1.5   | 0.91  |
| AT2G22300 | SR1       | calmodulin-binding transcription activator 3                             | + | - | - | 0.95 | 1.43  | 1.21  |
| AT3G21630 | CERK1     | chitin elicitor receptor kinase 1                                        | + | + | + | 0.95 | 1.62  | 1.3   |
| AT3G01320 | SNL1      | paired amphipathic helix protein Sin3-like 1                             | - | - | + | 0.95 | 1.9   | 1.29  |
| AT5G58120 | AT5G58120 | TIR-NBS-LRR class disease resistance protein                             | + | - | - | 0.95 | 1.83  | 3.64  |

|           |           |                                                                                           |   |   |   |   |      |       |       |
|-----------|-----------|-------------------------------------------------------------------------------------------|---|---|---|---|------|-------|-------|
| AT2G25000 | WRKY60    | putative WRKY transcription factor 60                                                     | + | + | + |   | 0.94 | 1.76  | 4.02  |
| AT4G23480 |           | PLAC8 family protein                                                                      | + | + | - |   | 0.94 | 2.1   | 2.43  |
| AT2G47190 | MYB2      | R2R3 MYB DNA binding domain transcription factor                                          | - | + | - | A | A    |       | 1.59  |
| AT1G33560 | ADR1      | disease resistance protein ADR1                                                           | + | - | - |   | 0.94 | 0.96  | 1.8   |
| AT2G25140 | CLPB4     | casein lytic proteinase B4                                                                | - | - | + |   | 0.92 | 1.67  | 1.26  |
| AT3G46620 | RDUF1     | C3H4 type zinc finger protein                                                             | + | - | + |   | 0.92 | 1.4   | 1.65  |
| AT2G47180 | GolS1     | galactinol synthase 1                                                                     | - | - | + |   | 0.92 | -2.44 | 0.81  |
| AT4G16760 | ACX1      | peroxisomal acyl-coenzyme A oxidase 1                                                     | + | + | - |   | 0.92 | 0.79  | 1.62  |
| AT1G05010 | EFE       | l-aminocyclopropane-1-carboxylate oxidase                                                 | + | + | + |   | 0.92 | 1.49  | 0.91  |
| AT1G75020 | LPAT4     | lysophosphatidyl acyltransferase 4                                                        | - | + | - |   | 0.91 | 1.25  | 1.84  |
| AT2G27660 | AT2G27660 | cysteine/histidine-rich C1 domain-containing protein                                      | + | - | + | A |      | 1.24  | 3.43  |
| AT2G16720 | MYB7      | myb domain protein 7                                                                      | - | + | - |   | 0.91 | 1     | 2.23  |
| AT5G10380 | RING1     | E3 ubiquitin-protein ligase RING1                                                         | + | + | + |   | 0.91 | 1.46  | 3.14  |
| AT5G35320 | AT5G35320 | hypothetical protein                                                                      | - | - | + |   | 0.91 | 1.25  | 1.58  |
| AT1G53350 | AT1G53350 | putative disease resistance RPP8-like protein                                             | + | - | - | A |      | 1.66  | 1.07  |
| AT4G26850 | VTC2      | GDP-L-galactose phosphorylase 1                                                           | + | - | - |   | 0.9  | -1.07 | 1.95  |
| AT3G44630 | AT3G44630 | TIR-NBS-LRR class disease resistance protein                                              | + | - | - |   | 0.89 | 1.21  | 2.16  |
| AT1G28190 | AT1G28190 | hypothetical protein                                                                      | - | + | - |   | 0.89 | 1.45  | 0.81  |
| AT5G46330 | FLS2      | LRR receptor-like serine/threonine-protein kinase FLS2                                    | + | - | - |   | 0.89 | 1.32  | -0.69 |
| AT1G51820 | AT1G51820 | putative LRR receptor-like serine/threonine protein kinase                                | + | - | + |   | 0.89 | 1.15  | 0.55  |
| AT2G16900 | AT2G16900 | phospholipase-like protein (PEARLI 4) family                                              | + | - | + |   | 0.88 | 1.63  | 1.39  |
| AT5G24090 | CHIA      | chitinase A                                                                               | - | - | + | A |      | 1.33  | 1.69  |
| AT1G15890 | AT1G15890 | CC-NBS-LRR class disease resistance protein                                               | + | - | - |   | 0.88 | 1.15  | 0.09  |
| AT5G19875 | AT5G19875 | hypothetical protein                                                                      | - | - | + |   | 0.88 | 1.06  | 3.43  |
| AT5G51630 | AT5G51630 | TIR-NBS-LRR class disease resistance protein                                              | + | - | - | A |      | 2.05  | 2.25  |
| AT3G04220 | AT3G04220 | TIR-NBS-LRR class disease resistance protein                                              | + | - | - |   | 0.87 | 0.98  | 1.46  |
| AT5G61010 | EX070E2   | exocyst subunit exo70 family protein E2                                                   | - | + | - |   | 0.87 | 1.6   | 2.16  |
| AT5G61210 | SNAP33    | soluble N-ethylmaleimide-sensitive factor adaptor protein 33                              | + | + | + |   | 0.86 | 1.86  | 2.03  |
| AT1G13750 | AT1G13750 | Purple acid phosphatases superfamily protein                                              | + | - | - |   | 0.86 | 1.9   | 1.42  |
| AT3G20410 | CPK9      | calmodulin-domain protein kinase 9                                                        | + | + | - |   | 0.86 | 1.24  | 1.07  |
| AT3G59700 | HLECRK    | lectin-receptor kinase                                                                    | + | - | - |   | 0.85 | 2.32  | 1.74  |
| AT1G34750 | AT1G34750 | putative protein phosphatase 2C 10                                                        | + | - | - |   | 0.85 | 2.38  | 2.65  |
| AT4G04920 | SFR6      | mediator of RNA polymerase II transcription subunit 16                                    | - | - | + |   | 0.85 | 1.87  | 1.5   |
| AT5G12400 | AT5G12400 | PHD-finger and DNA binding domain-containing protein                                      | - | - | + |   | 0.84 | 1.69  | 0.94  |
| AT5G43910 | AT5G43910 | pfkB-like carbohydrate kinase family protein                                              | - | + | - |   | 0.84 | 3.13  | 3.72  |
| AT5G56030 | HSP81-2   | heat shock protein 81-2                                                                   | + | - | - |   | 0.83 | 1.52  | 0.64  |
| AT2G11520 | CRCK3     | calmodulin-binding receptor-like cytoplasmic kinase 3                                     | + | + | - |   | 0.83 | 1.48  | 1.73  |
| AT3G54960 | PDIL1-3   | protein PDI-like 1-3                                                                      | - | - | + |   | 0.83 | 2     | 2.04  |
| AT5G66900 | AT5G66900 | CC-NBS-LRR class disease resistance protein///CC-NBS-LRR class disease resistance protein | + | - | - |   | 0.83 | 1.56  | 1.23  |
| AT4G23450 | AIRP1     | C3H2C3-type RING E3 Ub ligase                                                             | - | - | + |   | 0.83 | 1.79  | 2.32  |
| AT2G36470 | AT2G36470 | hypothetical protein                                                                      | + | + | + |   | 0.82 | 2.3   | -0.11 |
| AT5G05730 | ASA1      | anthranilate synthase component I-1                                                       | + | + | + |   | 0.81 | 1.38  | 0.15  |
| AT1G18890 | CDPK1     | calcium-dependent protein kinase 1                                                        | + | + | - |   | 0.81 | 1.72  | 2.24  |
| AT1G72300 | PSY1R     | tyrosine-sulfated glycopeptide receptor 1                                                 | + | - | - |   | 0.8  | -0.14 | 1.02  |
| AT1G77510 | PDIL1-2   | protein disulfide-isomerase 2                                                             | - | - | + |   | 0.8  | 2.54  | 2.45  |
| AT5G49570 | PNG1      | peptide-N(4)-(N-acetyl-beta-glucosaminyl)asparagine amidase                               | - | + | - |   | 0.79 | 1.76  | 2     |

|           |           |                                                                                             |   |   |   |      |      |       |
|-----------|-----------|---------------------------------------------------------------------------------------------|---|---|---|------|------|-------|
| AT5G46490 | AT5G46490 | TIR-NBS-LRR class disease resistance protein///TIR-NBS-LRR class disease resistance protein | + | - | - | 0.79 | 0.66 | 1.15  |
| AT1G14790 | RDR1      | RNA-dependent RNA polymerase 1                                                              | + | + | + | 0.79 | 1.54 | 1.75  |
| AT1G31280 | AG02      | Argonaute family protein                                                                    | + | - | - | 0.78 | 1.99 | 1.32  |
| AT3G59660 | AT3G59660 | C2 domain and GRAM domain-containing protein                                                | + | + | - | 0.78 | 1.68 | 1.76  |
| AT5G03630 | ATMDAR2   | monodehydroascorbate reductase (NADH)                                                       | - | - | + | 0.78 | 1.23 | 1.08  |
| AT3G62600 | ATERDJ3B  | DNAJ heat shock family protein                                                              | - | - | + | 0.77 | 1.96 | 1.86  |
| AT5G61790 | CNX1      | calnexin 1                                                                                  | - | - | + | 0.77 | 1.71 | 1.22  |
| AT5G67340 | AT5G67340 | ARM repeat superfamily protein                                                              | + | + | - | 0.76 | 2.73 | 2.73  |
| AT1G64060 | RBOH F    | respiratory burst oxidase                                                                   | + | + | + | 0.76 | 1.15 | 1.73  |
| AT1G70520 | CRK2      | cysteine-rich receptor-like protein kinase 2                                                | - | - | + | 0.76 | 1.15 | 0.37  |
| AT2G30870 | GSTF10    | glutathione S-transferase PHI 10                                                            | + | - | - | 0.76 | 1.21 | -0.27 |
| AT1G50740 | AT1G50740 | transmembrane protein 14C                                                                   | + | - | - | 0.75 | 1.72 | 1.89  |
| AT1G30620 | MUR4      | UDP-arabinose 4-epimerase                                                                   | + | - | - | 0.75 | 2.15 | 1.28  |
| AT3G25230 | ROF1      | rotamase FKBP 1                                                                             | - | - | + | 0.75 | 1.16 | 0.22  |
| AT4G03960 | PFA-DSP4  | atypical dual-specificity phosphatase 4                                                     | + | - | - | 0.75 | 1.35 | 1.27  |
| AT3G07040 | RPM1      | disease resistance protein RPM1                                                             | + | - | - | 0.74 | 1.14 | 0.72  |
| AT5G27830 | AT5G27830 | hypothetical protein                                                                        | - | - | + | 0.74 | 1.68 | 1.95  |
| AT2G27170 | TTN7      | structural maintenance of chromosome 3                                                      | + | - | - | 0.74 | 1.07 | A     |
| AT1G70140 | FHS       | formin-like protein 8                                                                       | + | - | + | 0.74 | 1.9  | 1.66  |
| AT3G18690 | MKS1      | MAP kinase substrate 1                                                                      | + | - | - | 0.74 | 1.23 | 1.04  |
| AT3G15210 | ERF4      | ethylene-responsive transcription factor 4                                                  | + | - | + | 0.73 | 1.14 | 1.58  |
| AT1G31130 | AT1G31130 | hypothetical protein                                                                        | + | - | - | 0.73 | 1.01 | 1.6   |
| AT1G21270 | WAK2      | wall-associated receptor kinase 2                                                           | - | + | - | 0.72 | 1.26 | 0.94  |
| AT4G12470 | AZII      | azelaic acid induced 1                                                                      | + | + | - | 0.71 | 2.63 | 0.12  |
| AT1G63750 | AT1G63750 | TIR-NBS-LRR class disease resistance protein                                                | + | - | - | A    | 1.29 | 2.14  |
| AT3G49120 | PRXCB     | peroxidase 34///peroxidase 33                                                               | + | - | + | 0.7  | 2.06 | 2.02  |
| AT1G63740 | AT1G63740 | TIR-NBS-LRR class disease resistance protein                                                | + | - | - | 0.7  | 1.25 | 0.38  |
| AT4G08770 | Prx37     | putative apoplastic peroxidase Prx37                                                        | + | - | - | A    | 2.07 | 2.29  |
| AT5G10190 | AT5G10190 | major facilitator protein                                                                   | + | - | - | 0.7  | 1.18 | 1.35  |
| AT1G76930 | EXT4      | extensin 4                                                                                  | - | + | - | 0.7  | 0.09 | 1.26  |
| AT2G05940 | RIPK      | RPM1-induced protein kinase                                                                 | + | + | - | 0.7  | 1.81 | 2.09  |
| AT3G46930 | AT3G46930 | protein kinase family protein                                                               | - | - | + | A    | 1.85 | 1.98  |
| AT3G05650 | RLP32     | receptor like protein 32                                                                    | + | + | + | 0.69 | 2.66 | 2.87  |
| AT2G17290 | CPK6      | Calcium-dependent protein kinase family protein                                             | + | + | - | 0.68 | 1.87 | 2.37  |
| AT5G05410 | DREB2A    | dehydration-responsive element-binding protein 2A                                           | - | - | + | 0.68 | 3.14 | 0.84  |
| AT4G17070 | AT4G17070 | peptidyl-prolyl cis-trans isomerase                                                         | - | - | + | 0.68 | 1.73 | 2.32  |
| AT4G12120 | SEC1B     | protein transport seclb                                                                     | + | - | - | 0.68 | 1.89 | 1.37  |
| AT3G28940 | AT3G28940 | AIG2-like protein                                                                           | + | - | - | 0.68 | 1.12 | 0.75  |
| AT3G50970 | LTI30     | dehydrin Xero 2                                                                             | + | - | - | 0.68 | 0.54 | -1.18 |
| AT3G57530 | CPK32     | calcium-dependent protein kinase 32                                                         | + | + | - | 0.68 | 1.28 | 1.73  |
| AT3G45040 | AT3G45040 | putative dolichol kinase                                                                    | + | + | - | 0.68 | 1.51 | 1.61  |
| AT2G44180 | MAP2A     | methionine aminopeptidase 2A                                                                | + | - | - | 0.67 | 2.01 | 2.19  |
| AT1G72950 | AT1G72950 | TIR-NBS class of disease resistance protein                                                 | + | - | - | A    | A    | 1.76  |
| AT4G23850 | LACS4     | long chain acyl-CoA synthetase 4                                                            | + | - | - | 0.67 | 1.18 | 1.81  |
| AT4G01010 | CNGC13    | cyclic nucleotide-gated channel 13                                                          | + | + | - | 0.67 | 1.7  | 2.25  |
| AT3G21220 | MKK5      | mitogen-activated protein kinase kinase 5                                                   | + | - | - | 0.67 | 1.14 | 1.64  |

|           |           |                                                                                              |   |   |   |      |       |       |
|-----------|-----------|----------------------------------------------------------------------------------------------|---|---|---|------|-------|-------|
| AT1G56340 | CRT1a     | calreticulin-1                                                                               | - | - | + | 0.67 | 1.17  | 0.67  |
| AT5G66070 | AT5G66070 | RING/U-box superfamily protein                                                               | + | - | + | 0.67 | 1.32  | 0.44  |
| AT5G60360 | ALP       | thiol protease aleurain                                                                      | - | - | + | 0.67 | 0.74  | 1.44  |
| AT3G63420 | GG1       | Ggamma-subunit 1                                                                             | + | - | - | 0.66 | 1.39  | 1.06  |
| AT4G29520 | AT4G29520 | hypothetical protein                                                                         | - | - | + | 0.66 | 1.84  | 1.63  |
| AT3G46530 | RPP13     | disease resistance protein RPP13                                                             | + | - | - | 0.66 | 2.19  | 1.71  |
| AT2G17220 | Kin3      | putative serine/threonine-specific protein kinase kin3                                       | + | + | - | 0.65 | 1.79  | 1.98  |
| AT1G12200 | FMO       | putative flavin monooxygenase.                                                               | + | - | - | 0.65 | 2.04  | 1.06  |
| AT3G01080 | WRKY58    | WRKY DNA-binding protein 58                                                                  | + | - | - | A    | 4.13  | 4.34  |
| AT3G63010 | GID1B     | putative gibberellin receptor GID1L2                                                         | + | + | + | A    | 0.97  | 2.34  |
| AT1G66080 | AT1G66080 | hypothetical protein                                                                         | - | - | + | 0.65 | 1.15  | 1.34  |
| AT1G56510 | WRR4      | TIR-NB-LRR disease resistance protein                                                        | + | - | - | 0.65 | 1.29  | 2.28  |
| AT5G55070 | AT5G55070 | dihydropolyllysine-residue succinyltransferase component of 2-oxoglutarate dehydrogenase com | - | - | + | 0.64 | 0.93  | 1.11  |
| AT5G55450 | AT5G55450 | bifunctional inhibitor/lipid-transfer protein/seed storage 2S albumin-like protein           | + | + | + | 0.64 | 2.98  | 2.89  |
| AT1G59124 | AT1G59124 | putative disease resistance protein///putative disease resistance protein RDL5               | + | - | - | 0.63 | 1.14  | 1.24  |
| AT5G55310 | TOP1BETA  | DNA topoisomerase 1 beta                                                                     | + | - | - | 0.63 | 0.86  | 1.04  |
| AT2G02810 | UTR1      | UDP-galactose transporter 1                                                                  | - | - | + | 0.63 | 1.51  | 1.15  |
| AT1G72890 | AT1G72890 | TIR-NBS class of disease resistance protein                                                  | + | - | - | 0.63 | 0.74  | 1.24  |
| AT4G08180 | ORP1C     | OSBP(oxysterol binding protein)-related protein 1C                                           | + | + | - | 0.62 | 1.05  | 0.8   |
| AT5G07340 | AT5G07340 | calnexin2                                                                                    | - | - | + | 0.62 | 1.24  | 0.99  |
| AT4G33300 | ADR1-L1   | putative disease resistance protein ADR1-like 1                                              | + | - | - | 0.62 | 1.54  | 1.72  |
| AT5G38710 | AT5G38710 | proline dehydrogenase 2                                                                      | - | + | - | 0.61 | 1.77  | 1.1   |
| AT3G16050 | PDX1.2    | putative pyridoxal biosynthesis protein PDX1.2                                               | - | - | + | 0.61 | 2.03  | 2.01  |
| AT1G13340 | AT1G13340 | Regulator of Vps4 activity in the MVB pathway protein                                        | + | + | + | 0.61 | 2.61  | 4.04  |
| AT1G65870 | AT1G65870 | Disease resistance-responsive (dirigent-like protein) family protein                         | + | - | - | 0.61 | 0.27  | 2.91  |
| AT1G54040 | ESP       | epithiospecifier protein                                                                     | + | - | - | 0.61 | 0.02  | -1    |
| AT3G10640 | VPS60.1   | vacuolar protein sorting protein 60.1                                                        | + | + | - | 0.61 | 1.2   | 1.24  |
| AT1G69270 | RPK1      | receptor-like protein kinase 1                                                               | + | + | + | 0.6  | 1.62  | 1.65  |
| AT3G49530 | NAC062    | NAC domain-containing protein 62                                                             | + | - | + | 0.6  | 1.99  | 1.72  |
| AT5G27520 | PNC2      | peroxisomal adenine nucleotide carrier 2                                                     | - | + | - | 0.59 | 1.07  | 1.26  |
| AT3G51130 | AT3G51130 | hypothetical protein                                                                         | - | + | - | 0.59 | 1.03  | 1.38  |
| AT2G04795 | AT2G04795 | hypothetical protein                                                                         | - | - | + | 0.59 | 0.01  | 2.73  |
| AT2G16500 | ADC1      | arginine decarboxylase 1                                                                     | - | - | + | 0.59 | 0.02  | 1.13  |
| AT3G13050 | NiaP      | nicotinate transporter                                                                       | - | + | - | 0.59 | 0.97  | 1.05  |
| AT5G03160 | P58IPK    | mamallian P58IPK-like protein                                                                | - | - | + | 0.58 | 1.38  | 1.34  |
| AT1G78380 | GSTU19    | glutathione S-transferase TAU 19                                                             | - | - | + | 0.57 | 1.07  | 0.59  |
| AT4G37560 | AT4G37560 | acetamidase/formamidase family protein                                                       | + | - | - | 0.57 | -0.07 | 1.5   |
| AT5G40910 | AT5G40910 | TIR-NBS-LRR class disease resistance protein                                                 | + | - | - | 0.57 | 1.02  | 0.91  |
| AT1G11310 | ML02      | ML0-like protein 2                                                                           | + | + | + | 0.57 | 1.73  | 1.24  |
| AT5G46350 | WRKY8     | putative WRKY transcription factor 8                                                         | + | - | + | 0.57 | 1.76  | 2.36  |
| AT1G16670 | AT1G16670 | kinase domain-containing protein                                                             | + | + | - | 0.57 | 2.03  | 1.5   |
| AT5G35735 | AT5G35735 | putative auxin-responsive protein                                                            | + | + | - | 0.57 | 1.94  | 1.04  |
| AT1G44414 | AT1G44414 | hypothetical protein                                                                         | - | - | + | A    | 1.68  | A     |
| AT1G12290 | AT1G12290 | CC-NBS-LRR class disease resistance protein                                                  | + | - | - | A    | 1.58  | 2.65  |
| AT1G33600 | AT1G33600 | leucine-rich repeat-containing protein                                                       | + | + | + | 0.56 | 0.62  | -1.14 |
| AT4G17880 | MYC4      | transcription factor MYC4                                                                    | + | - | - | 0.56 | -0.61 | 1.52  |

|           |            |                                                                                         |   |   |   |   |      |       |       |
|-----------|------------|-----------------------------------------------------------------------------------------|---|---|---|---|------|-------|-------|
| AT1G76770 | AT1G76770  | alpha-crystallin domain of heat shock protein-containing protein                        | - | - | + | A | 1.39 | A     |       |
| AT1G70000 | AT1G70000  | myb-like transcription factor                                                           | - | + | - |   | 0.55 | 0.36  | 2.57  |
| AT5G36930 | AT5G36930  | TIR-NBS-LRR class disease resistance protein                                            | + | - | - |   | 0.55 | 1.76  | 1.36  |
| AT1G16540 | ABA3       | molybdenum cofactor sulfurase                                                           | + | + | + |   | 0.55 | 1.38  | 1.21  |
| AT4G37460 | SRFR1      | suppressor of RPS4-RLD 1                                                                | + | - | - |   | 0.54 | 0.07  | 1.15  |
| AT4G23280 | CRK20      | putative cysteine-rich receptor-like protein kinase 20                                  | + | + | - |   | 0.54 | 1.33  | 0.93  |
| AT3G28210 | PMZ        | zinc finger (AN1-like) family protein                                                   | - | + | - |   | 0.53 | 3.55  | 2.14  |
| AT1G73650 | AT1G73650  | hypothetical protein                                                                    | + | - | - |   | 0.53 | 0.35  | 1.76  |
| AT3G44190 | AT3G44190  | FAD/NAD(P)-binding oxidoreductase family protein                                        | - | - | + |   | 0.53 | 1.43  | 0.93  |
| AT5G22690 | AT5G22690  | TIR-NBS-LRR class disease resistance protein                                            | + | - | - |   | 0.52 | 0.42  | 1.06  |
| AT2G32920 | PDIL2-3    | protein disulfide-isomerase like 2-3                                                    | - | - | + |   | 0.52 | 1.26  | 0.89  |
| AT1G22070 | TGA3       | transcription factor TGA3                                                               | + | + | + |   | 0.52 | 1.38  | -0.15 |
| AT1G17610 | CHS1       | disease resistance protein (TIR-NBS class)                                              | + | + | + |   | 0.52 | 1.37  | 1.52  |
| AT5G46510 | VICTL      | TIR-NBS-LRR class disease resistance protein                                            | + | - | - |   | 0.52 | 1.13  | 0.24  |
| AT3G11220 | EL01       | elongator complex protein 4                                                             | - | - | + |   | 0.52 | 1.02  | 1.07  |
| AT4G12000 | AT4G12000  | SNARE associated Golgi family protein                                                   | - | - | + |   | 0.51 | -0.06 | 2.07  |
| AT3G51920 | CAM9       | calmodulin-like protein                                                                 | + | - | - |   | 0.51 | -0.24 | 1.8   |
| AT1G62740 | Hop2       | carboxylate clamp-tetratricopeptide repeat protein                                      | - | - | + |   | 0.5  | 1.34  | 0.76  |
| AT1G34420 | AT1G34420  | leucine-rich repeat transmembrane protein kinase-like protein                           | + | + | - | A | 2.1  | 2.28  |       |
| AT3G49350 | AT3G49350  | RabGAP/TBC domain-containing protein                                                    | + | + | - |   | 0.5  | 0.97  | 1.07  |
| AT3G60690 | AT3G60690  | SAUR-like auxin-responsive protein                                                      | - | + | - |   | 0.5  | 0.44  | 1.56  |
| AT3G52800 | AT3G52800  | zinc finger A20 and AN1 domain-containing stress-associated protein 6                   | + | - | + |   | 0.49 | 1.1   | 2.25  |
| AT3G23990 | HSP60      | heat shock protein 60                                                                   | - | - | + |   | 0.49 | 1.29  | 0.06  |
| AT1G27330 | AT1G27330  | ribosome associated membrane protein RAMP4///ribosome associated membrane protein RAMP4 | - | - | + |   | 0.49 | 0.93  | 1.01  |
| AT2G46500 | PI4K GAMMA | phosphoinositide 4-kinase gamma 4                                                       | + | + | + |   | 0.49 | 1.23  | 1.32  |
| AT4G02550 | AT4G02550  | hypothetical protein                                                                    | + | - | - |   | 0.49 | 1.26  | 0.01  |
| AT4G12010 | AT4G12010  | TIR-NBS-LRR class disease resistance protein                                            | + | - | - |   | 0.48 | 1.39  | 0.89  |
| AT2G46510 | AIB        | transcription factor ABA-INDUCIBLE bHLH-TYPE                                            | - | + | - |   | 0.48 | 1.06  | 1.39  |
| AT2G13780 | SERK4      | somatic embryogenesis receptor kinase 4                                                 | + | - | - | A | 3.04 | A     |       |
| AT4G34000 | ABF3       | abscisic acid responsive elements-binding factor 3                                      | - | + | + |   | 0.48 | -0.38 | 1.97  |
| AT2G23320 | WRKY15     | WRKY DNA-binding protein 15                                                             | + | - | + |   | 0.48 | 1.01  | 1.3   |
| AT5G53400 | BOB1       | protein BOBBER 1                                                                        | - | - | + |   | 0.48 | 1.22  | 0.7   |
| AT4G08500 | MEKK1      | mitogen-activated protein kinase kinase kinase 1                                        | + | + | - |   | 0.47 | 1.05  | 1.27  |
| AT5G07460 | PMSR2      | peptide methionine sulfoxide reductase A2                                               | - | - | + |   | 0.47 | -0.15 | -1.1  |
| AT5G45260 | RRS1       | disease resistance protein RRS1                                                         | + | - | - |   | 0.46 | 1.03  | 0.58  |
| AT1G09210 | CRT1b      | calreticulin 1b                                                                         | - | - | + |   | 0.46 | 0.97  | 1.13  |
| AT5G21090 | AT5G21090  | leucine-rich repeat-containing protein                                                  | - | - | + |   | 0.46 | 0.75  | 1.26  |
| AT1G77120 | ADH1       | alcohol dehydrogenase 1                                                                 | - | + | + |   | 0.46 | 2.87  | 0.97  |
| AT5G45250 | RPS4       | TIR-NBS-LRR class disease resistance protein                                            | + | - | - |   | 0.45 | 1.49  | 1.19  |
| AT3G46510 | PUB13      | U-box domain-containing protein 13                                                      | + | - | - |   | 0.44 | 0.68  | 1.01  |
| AT3G04710 | TPR10      | carboxylate clamp-tetratricopeptide repeat protein                                      | - | - | + |   | 0.44 | 1.07  | 0.15  |
| AT4G00550 | DGD2       | digalactosyldiacylglycerol synthase 2                                                   | + | + | - |   | 0.44 | 1.24  | 1.32  |
| AT1G15430 | AT1G15430  | hypothetical protein                                                                    | + | + | - |   | 0.44 | 1.32  | 1.17  |
| AT1G63460 | GPX8       | glutathione peroxidase 8                                                                | - | - | + |   | 0.43 | 1.25  | 1.43  |
| AT2G25110 | SDF2       | stromal cell-derived factor 2-like protein                                              | + | - | + |   | 0.43 | 1.35  | 1.27  |
| AT5G37480 | AT5G37480  | hypothetical protein                                                                    | + | + | - |   | 0.43 | 0.84  | 1.24  |



|           |            |                                                                                             |   |   |   |      |       |       |
|-----------|------------|---------------------------------------------------------------------------------------------|---|---|---|------|-------|-------|
| AT4G26970 | AC02       | aconitase 2                                                                                 | - | - | + | 0.43 | 1.16  | 0.81  |
| AT1G65040 | Hrd1B      | HRD1-like protein                                                                           | - | - | + | 0.42 | 1.27  | 0.83  |
| AT5G47250 | AT5G47250  | putative disease resistance protein                                                         | + | - | - | 0.42 | 1.4   | 1.39  |
| AT4G13810 | RLP47      | receptor like protein 47                                                                    | + | - | - | 0.42 | -0.35 | 1.42  |
| AT2G42540 | COR15A     | cold-regulated protein 15a                                                                  | + | + | + | 0.41 | 0.14  | -4.46 |
| AT3G02885 | GASA5      | gibberellin-regulated protein 5                                                             | - | + | - | 0.4  | -0.6  | -1.03 |
| AT5G67480 | BT4        | BTB and TAZ domain protein 4                                                                | - | + | + | 0.4  | 1.58  | -1.4  |
| AT1G54320 | AT1G54320  | ALA-interacting subunit 3                                                                   | - | + | - | 0.4  | 0.83  | 1.02  |
| AT2G26300 | GP ALPHA 1 | guanine nucleotide-binding protein alpha-1 subunit                                          | - | + | + | 0.4  | 1.08  | 1.14  |
| AT1G58842 |            | putative disease resistance protein RDL6/RF9///putative disease resistance protein RDL6/RF9 | + | - | - | 0.39 | 0.9   | 1.18  |
| AT1G52890 | NAC019     | NAC domain-containing protein 19                                                            | - | + | - | A    | 1.46  | 1.68  |
| AT5G17880 | CSA1       | TIR-NBS-LRR class disease resistance protein                                                | + | - | - | 0.38 | 1.2   | 1.06  |
| AT1G29690 | CAD1       | MAC/Perforin domain-containing protein                                                      | + | + | + | 0.38 | 1.52  | 1.25  |
| AT1G05690 | BT3        | BTB and TAZ domain protein 3                                                                | - | + | + | 0.38 | -0.58 | 1.09  |
| AT5G20320 | DCL4       | dicer-like protein 4                                                                        | + | - | - | 0.38 | 0.83  | 1.13  |
| AT4G29810 | MKK2       | mitogen-activated protein kinase kinase 2                                                   | + | + | + | 0.38 | 1.66  | 1.84  |
| AT5G40010 | AATP1      | AAA-ATPase 1                                                                                | - | + | + | A    | 2.52  | 1.76  |
| AT4G19510 | AT4G19510  | TIR-NBS-LRR class disease resistance protein                                                | + | - | - | 0.37 | 0.31  | 1.24  |
| AT1G57830 | AT1G57830  | Toll-Interleukin-Resistance domain-containing protein                                       | + | - | - | 0.37 | -1.93 | -0.17 |
| AT2G22240 | MIPS2      | myo-inositol-1-phosphate synthase 2                                                         | + | - | + | 0.36 | -2.51 | 0.88  |
| AT4G32770 | VTE1       | tocopherol cyclase                                                                          | + | - | + | 0.36 | -1.59 | -0.08 |
| AT4G11260 | SGT1B      | phosphatase SGT1b                                                                           | + | + | + | 0.35 | 0.87  | 1.13  |
| AT2G43510 | TI1        | defensin-like protein 195                                                                   | + | - | - | 0.34 | 0.3   | 2.51  |
| AT1G62730 | AT1G62730  | isoprenoid biosynthesis enzyme domain-containing protein                                    | - | - | + | 0.34 | 1.25  | 1.03  |
| AT3G11660 | NHL1       | NDR1/HIN1-Like protein 1                                                                    | + | - | - | 0.34 | 0.07  | 1.31  |
| AT1G62630 | AT1G62630  | CC-NBS-LRR class disease resistance protein///CC-NBS-LRR class disease resistance protein   | + | - | - | 0.34 | 0.65  | 1.1   |
| AT1G06180 | MYB13      | myb domain protein 13                                                                       | - | + | - | 0.34 | 0.57  | 2.18  |
| AT4G29330 | DER1       | derlin-1                                                                                    | - | - | + | 0.34 | 1.05  | 1.01  |
| AT4G09460 | MYB6       | transcription repressor MYB6                                                                | - | + | - | 0.33 | 0.37  | 1.15  |
| AT1G32230 | RCD1       | inactive poly [ADP-ribose] polymerase RCD1                                                  | + | + | + | 0.33 | 1.12  | 1     |
| AT1G29340 | PUB17      | U-box domain-containing protein 17                                                          | + | - | - | 0.33 | 1.1   | 0.95  |
| AT5G07690 | MYB29      | myb domain protein 29                                                                       | + | + | - | 0.33 | -0.91 | -1.57 |
| AT2G35940 | BLH1       | BEL1-like homeodomain 1                                                                     | - | + | + | 0.33 | 0.87  | 2.48  |
| AT2G28200 | AT2G28200  | zinc finger protein ZAT5                                                                    | - | - | + | 0.33 | -0.36 | 2.45  |
| AT5G13680 | AB01       | elongator complex protein 1                                                                 | - | - | + | 0.33 | 1.17  | 0.93  |
| AT4G33920 | APD5       | putative protein phosphatase 2C 63                                                          | + | - | - | 0.32 | 1.28  | 1.18  |
| AT3G53260 | PAL2       | phenylalanine ammonia-lyase 2                                                               | + | - | + | 0.32 | -1.04 | 0.33  |
| AT2G40000 | HSPRO2     | HS1 PRO-1 2-like protein                                                                    | + | + | + | 0.31 | 1.35  | 2.56  |
| AT3G05020 | ACP1       | acyl carrier protein 1                                                                      | + | - | - | 0.3  | -1.01 | -0.95 |
| AT5G59420 | ORP3C      | oxysterol binding protein-related protein 3C                                                | + | + | + | 0.29 | 1.07  | 0.95  |
| AT5G47120 | BI1        | BAX inhibitor 1                                                                             | + | + | - | 0.29 | 1.29  | 1.58  |
| AT3G05970 | LACS6      | long-chain acyl-CoA synthetase 6                                                            | + | - | - | 0.29 | 1.55  | 1.79  |
| AT5G07470 | PMSR3      | peptide methionine sulfoxide reductase A3                                                   | - | - | + | 0.29 | 0.45  | 1.09  |
| AT3G27890 | NQR        | NADPH:quinone oxidoreductase                                                                | + | + | + | 0.28 | 0.63  | 1.29  |
| AT5G20830 | SUS1       | sucrose synthase 1                                                                          | - | + | + | 0.28 | 2.26  | 1.42  |
| AT1G66330 | AT1G66330  | putative senescence-associated protein                                                      | - | - | + | 0.28 | -1.31 | 1.2   |

|           |            |                                                                                           |   |   |   |      |       |       |
|-----------|------------|-------------------------------------------------------------------------------------------|---|---|---|------|-------|-------|
| AT5G52870 | MAKR5      | hypothetical protein                                                                      | - | - | + | 0.28 | 0.33  | 1.28  |
| AT5G46180 | DELTA-OAT  | ornithine-delta-aminotransferase                                                          | + | - | - | 0.28 | 0.3   | 1.18  |
| AT1G23740 | AOR        | alkenal/one oxidoreductase                                                                | + | - | - | 0.28 | -1.76 | 0.27  |
| AT3G03190 | GSTF11     | glutathione S-transferase F11                                                             | - | - | + | 0.27 | -0.44 | -2.06 |
| AT3G60190 | DL1E       | dynammin-related protein 1E                                                               | + | + | + | 0.27 | 1.22  | 0.72  |
| AT4G12480 | EARL11     | putative lipid transfer protein                                                           | + | + | - | 0.26 | 2.47  | 1.85  |
| AT3G11280 | AT3G11280  | VHA-B1-interacting transcription factor, putative                                         | - | + | - | 0.26 | 0.65  | 1.9   |
| AT5G39890 | AT5G39890  | hypothetical protein                                                                      | - | + | + | A    | 2.06  | A     |
| AT5G18420 | AT5G18420  | hypothetical protein                                                                      | - | - | + | 0.25 | 1     | 0.64  |
| AT3G08970 | ATERDJ3A   | DnaJ domain-containing protein                                                            | - | - | + | A    | 0.85  | 1.42  |
| AT2G17520 | IRE1A      | endoribonuclease/protein kinase IRE1-like protein                                         | + | + | - | 0.22 | 1.12  | 1.28  |
| AT4G22890 | PGR5-LIKE  | PGR5-like protein 1A                                                                      | + | - | - | 0.21 | -1.1  | -0.88 |
| AT3G21230 | 4CL5       | 4-coumarate--CoA ligase 5                                                                 | + | - | - | 0.21 | 1.57  | 1.36  |
| AT1G10920 | LOV1       | disease susceptibility protein LOV1                                                       | + | - | - | A    | 0.8   | 1.14  |
| AT5G67300 | MYBR1      | transcription factor MYB44                                                                | + | + | - | 0.19 | -0.4  | 1.4   |
| AT3G50920 | LPPepsilon | phosphatidic acid phosphatase (PAP2) family protein                                       | - | - | + | 0.19 | 1.1   | 0.78  |
| AT5G38895 | AT5G38895  | RING/U-box superfamily protein                                                            | - | - | + | 0.18 | 1.2   | 1.14  |
| AT3G57550 | AGK2       | guanylate kinase                                                                          | + | - | - | 0.18 | 0.56  | 1.09  |
| AT2G21330 | FBA1       | fructose-bisphosphate aldolase 1                                                          | - | - | + | 0.18 | -1.64 | -0.11 |
| AT2G14580 | PRB1       | pathogenesis-related protein 1                                                            | - | + | - | 0.18 | -0.14 | 1.15  |
| AT3G17410 | AT3G17410  | putative serine/threonine protein kinase                                                  | + | + | - | 0.16 | 0.78  | 1.08  |
| AT1G22180 | AT1G22180  | Sec14p-like phosphatidylinositol transfer family protein                                  | + | - | - | 0.16 | 1.64  | 1.51  |
| AT2G31070 | TCP10      | transcription factor TCP10                                                                | + | + | + | 0.16 | -1.01 | 0.06  |
| AT5G64930 | CPR5       | protein CPR-5                                                                             | + | - | + | 0.14 | -0.28 | 1.29  |
| AT2G30860 | GSTF9      | glutathione S-transferase PHI 9                                                           | + | - | - | 0.14 | 0.26  | -1    |
| AT1G02170 | MC1        | metacaspase 1                                                                             | + | + | - | 0.14 | 1.05  | 0.9   |
| AT5G65210 | TGA1       | transcription factor TGA1                                                                 | + | + | - | 0.12 | 0.58  | 1.57  |
| AT5G61290 | AT5G61290  | flavin-containing monooxygenase FMO GS-OX-like 8                                          | - | - | + | 0.12 | -0.04 | -2.06 |
| AT2G19310 | AT2G19310  | heat shock protein                                                                        | - | - | + | 0.12 | 1.34  | 0.77  |
| AT3G24900 | RLP39      | receptor like protein 39                                                                  | + | - | - | A    | 1.64  | 3.85  |
| AT5G24590 | TIP        | TCV-interacting protein                                                                   | + | - | - | 0.11 | 0.83  | 1.04  |
| AT5G58220 | TTL        | transthyretin-like protein                                                                | + | - | - | 0.11 | 0.86  | 1.19  |
| AT5G67160 | EPS1       | BAHD acyltransferase family protein                                                       | - | + | - | 0.11 | -0.12 | 2.23  |
| AT2G29650 | PHT4;1     | sodium-dependent phosphate transport protein 1                                            | + | + | + | 0.11 | -1.49 | -0.93 |
| AT4G29140 | ADS1       | putative MATE transport protein ADS1                                                      | + | - | - | A    | 1.2   | A     |
| AT1G18150 | ATMPK8     | mitogen-activated protein kinase 8                                                        | - | - | + | 0.07 | -0.17 | -1.58 |
| AT4G24670 | TAR2       | tryptophan aminotransferase related 2                                                     | + | - | - | 0.06 | -1.42 | -0.99 |
| AT5G22000 | RHF2A      | E3 ubiquitin-protein ligase RHF2A                                                         | - | + | - | 0.06 | -0.01 | 1.18  |
| AT3G61250 | MYB17      | LATE MERISTEM IDENTITY2                                                                   | - | + | - | 0.06 | -1.17 | 0.11  |
| AT1G80130 | AT1G80130  | tetratricopeptide repeat domain-containing protein                                        | - | - | + | 0.06 | -0.39 | 1.75  |
| AT1G31540 | AT1G31540  | TIR-NBS-LRR class disease resistance protein                                              | + | - | - | 0.04 | 1.18  | 1.26  |
| AT5G13220 | JAZ10      | protein TIFY 9                                                                            | - | + | - | 0.03 | 0.39  | 1.03  |
| AT5G60970 | TCP5       | transcription factor TCP5                                                                 | + | + | + | 0.03 | -1.25 | -0.4  |
| AT5G14930 | SAG101     | acyl hydrolase                                                                            | + | + | - | 0.02 | 1.42  | 1.92  |
| AT4G12490 | AT4G12490  | Bifunctional inhibitor/lipid-transfer protein/seed storage 2S albumin superfamily protein | + | - | - | 0.02 | 2.82  | 3.83  |
| AT3G10800 | BZIP28     | putative bZIP transcription factor                                                        | + | + | - | 0.01 | 1.02  | 1.27  |

|           |           |                                                                               |   |   |   |   |       |       |       |
|-----------|-----------|-------------------------------------------------------------------------------|---|---|---|---|-------|-------|-------|
| AT5G58670 | PLC1      | phosphoinositide phospholipase C 1                                            | + | + | + |   | 0.01  | -0.26 | -1.53 |
| AT1G02220 | NAC003    | NAC domain-containing protein                                                 | - | - | + | A |       | 1.14  | 3.83  |
| AT5G11920 | cwINV6    | beta-fructofuranosidase, insoluble isoenzyme CWINV6                           | - | + | + | A |       | 1.33  | 3     |
| AT5G60890 | MYB34     | myb domain protein 34                                                         | + | - | - |   | -0.01 | -1.18 | -0.36 |
| AT3G55800 | SBPASE    | Sedoheptulose-1,7-bisphosphatase                                              | + | + | + |   | -0.02 | -1.16 | -0.47 |
| AT1G56600 | Go1S2     | galactinol synthase 2                                                         | - | - | + |   | -0.03 | -0.99 | 1.69  |
| AT1G32220 | AT1G32220 | NAD(P)-binding Rossmann-fold-containing protein                               | - | - | + |   | -0.04 | -1.04 | -1.39 |
| AT3G60980 | AT3G60980 | pentatricopeptide repeat-containing protein                                   | - | - | + |   | -0.04 | -0.51 | -1.54 |
| AT3G14470 | AT3G14470 | NB-ARC domain-containing disease resistance protein                           | + | + | - |   | -0.04 | 2.21  | 1.74  |
| AT1G55210 | AT1G55210 | Disease resistance-responsive (dirigent-like protein) family protein          | + | - | - |   | -0.04 | 0.83  | 1.63  |
| AT5G10170 | MIPS3     | myo-inositol-1-phosphate synthase                                             | - | - | + |   | -0.07 | -0.03 | -1.28 |
| AT2G41430 | ERD15     | dehydration-induced protein ERD15                                             | - | - | + |   | -0.07 | -0.23 | -1.29 |
| AT5G02840 | LCL1      | protein LHY/CCA1-like 1                                                       | - | + | - |   | -0.08 | -1.98 | 1.03  |
| AT5G59780 | MYB59     | transcription factor MYB59                                                    | - | + | - |   | -0.11 | -2.4  | 0.32  |
| AT2G39730 | RCA       | ribulose biphosphate carboxylase/oxygenase activase                           | + | + | + |   | -0.12 | -1.02 | -0.42 |
| AT2G31180 | MYB14     | myb domain protein 14                                                         | - | + | - |   | -0.12 | -2.41 | -0.34 |
| AT5G24320 | AT5G24320 | transducin/WD40 domain-containing protein                                     | - | - | + |   | -0.12 | -1.1  | 0.04  |
| AT3G25020 | RLP42     | receptor like protein 42                                                      | + | - | - |   | -0.12 | 2.6   | 1.68  |
| AT4G33150 | AT4G33150 | lysine-ketoglutarate reductase/saccharopine dehydrogenase bifunctional enzyme | - | - | + |   | -0.13 | 0.36  | 1.15  |
| AT4G21980 | APG8A     | autophagy-related protein 8a                                                  | + | - | - |   | -0.14 | 0.5   | 1.23  |
| AT3G29320 | PHS1      | alpha-glucan phosphorylase 1                                                  | + | - | - |   | -0.14 | 0.04  | -3.23 |
| AT1G78600 | LZF1      | light-regulated zinc finger protein 1                                         | + | + | + |   | -0.14 | -0.37 | -3.41 |
| AT3G08670 | AT3G08670 | hypothetical protein                                                          | - | - | + |   | -0.14 | -1.02 | -1.1  |
| AT4G02195 | SYP42     | syntaxin-42                                                                   | + | - | - |   | -0.16 | 0.44  | 1.17  |
| AT1G15010 | AT1G15010 | hypothetical protein                                                          | + | - | - |   | -0.17 | 0.83  | 1.88  |
| AT1G50290 | AT1G50290 | hypothetical protein                                                          | - | - | + |   | -0.17 | -1.45 | -0.05 |
| AT3G17860 | JAZ3      | jasmonate-zim-domain protein 3                                                | + | - | - |   | -0.17 | -1.12 | -0.67 |
| AT5G37260 | RVE2      | MYB family transcription factor Circadian 1                                   | - | + | - | A |       | 2.04  | 1.68  |
| AT2G26400 | ARD3      | acireductone dioxygenase 3                                                    | - | + | + |   | -0.18 | 4.7   | 5.08  |
| AT3G15360 | TRX-M4    | thioredoxin M4                                                                | - | - | + |   | -0.18 | -0.44 | -1.09 |
| AT5G47390 | AT5G47390 | myb-like transcription factor family protein                                  | - | + | - |   | -0.19 | -1.11 | -0.68 |
| AT4G35600 | CST       | putative serine/threonine-protein kinase Cx32                                 | - | + | - |   | -0.19 | 1.48  | 2.52  |
| AT3G54050 | HCEF1     | fructose-1,6-bisphosphatase                                                   | + | - | - |   | -0.19 | -0.89 | -1.1  |
| AT5G37770 | TCH2      | calcium-binding protein CML24                                                 | - | - | + |   | -0.2  | -0.31 | 1.23  |
| AT2G13440 | AT2G13440 | glucose-inhibited division family A protein                                   | - | - | + |   | -0.2  | -0.47 | -1.05 |
| AT5G43750 | PnsB5     | NAD(P)H dehydrogenase 18                                                      | - | - | + |   | -0.21 | -1.19 | -1.08 |
| AT1G54410 | HIRD11    | dehydrin family protein                                                       | - | - | + |   | -0.21 | 0.01  | -1.21 |
| AT1G73260 | KTI1      | kunitz trypsin inhibitor 1                                                    | + | + | + | A | A     |       | 5.54  |
| AT4G29380 | VPS15     | phosphoinositide-3-kinase, regulatory subunit 4, p150                         | - | + | + |   | -0.21 | 0.73  | 1.16  |
| AT2G33050 | RLP26     | receptor like protein 27///receptor like protein 26                           | + | - | - |   | -0.21 | -0.34 | -1.09 |
| AT2G46220 | AT2G46220 | hypothetical protein                                                          | + | - | - |   | -0.22 | -1.16 | -0.56 |
| AT3G05660 | RLP33     | receptor like protein 33                                                      | + | + | + | A |       | 1.6   | 0.2   |
| AT5G45410 | AT5G45410 | hypothetical protein                                                          | - | + | - |   | -0.23 | -0.44 | 1.02  |
| AT5G59080 | AT5G59080 | hypothetical protein                                                          | - | - | + |   | -0.23 | -2.66 | -2.16 |
| AT2G23620 | MES1      | methyl esterase 1                                                             | + | - | - |   | -0.23 | -1.42 | 0.12  |
| AT1G32060 | PRK       | phosphoribulokinase                                                           | + | + | + |   | -0.24 | -1.19 | -0.74 |

|           |           |                                                           |   |   |   |       |       |       |
|-----------|-----------|-----------------------------------------------------------|---|---|---|-------|-------|-------|
| AT1G21910 | DREB26    | ethylene-responsive transcription factor ERF012           | - | + | - | -0.25 | -1.01 | -0.1  |
| AT5G15120 | AT5G15120 | hypothetical protein                                      | - | + | + | -0.26 | 1.23  | -0.75 |
| AT1G55870 | AHG2      | poly(A)-specific ribonuclease PARN                        | - | + | - | -0.28 | -1.04 | -0.05 |
| AT2G22550 | SVP       | MADS-box protein SVP                                      | + | + | + | -0.28 | -1.06 | -0.85 |
| AT3G47620 | TCP14     | transcription factor TCP14                                | + | - | - | -0.28 | -0.63 | -1.74 |
| AT3G14210 | ESM1      | epithiospecifier modifier 1                               | + | - | - | -0.29 | -0.6  | -1.26 |
| AT3G52960 | AT3G52960 | peroxiredoxin-2E                                          | + | - | - | -0.3  | -0.41 | -1.01 |
| AT3G50820 | PSB02     | oxygen-evolving enhancer protein 1-2                      | + | + | + | -0.3  | -1.2  | -0.85 |
| AT4G35770 | SEN1      | senescence-associated protein DIN1                        | - | - | + | -0.31 | -1.68 | 0.65  |
| AT4G25100 | FSD1      | superoxide dismutase [Fe]                                 | - | - | + | -0.32 | -1.33 | -0.58 |
| AT2G02740 | WHY3      | single-stranded DNA-binding protein WHY3                  | + | - | - | -0.32 | 0.05  | -1.16 |
| AT2G14610 | PR1       | pathogenesis-related protein 1                            | + | + | + | -0.33 | 4.42  | 7.22  |
| AT1G08810 | MYB60     | myb domain protein 60                                     | - | + | - | -0.33 | -0.44 | -1.19 |
| AT5G62790 | DXR       | 1-deoxy-D-xylulose 5-phosphate reductoisomerase           | - | - | + | -0.33 | -1.17 | -1.03 |
| AT1G06080 | ADS1      | delta-9 acyl-lipid desaturase 1                           | + | - | - | -0.34 | -1.03 | -1.51 |
| AT1G24240 | AT1G24240 | ribosomal protein L19 family protein                      | + | - | - | -0.35 | -0.28 | -1.33 |
| AT5G04230 | PAL3      | phenylalanine ammonia-lyase 3                             | + | - | - | -0.35 | -0.44 | -1.27 |
| AT1G75460 | AT1G75460 | ATP-dependent protease La domain-containing protein       | + | + | + | -0.36 | -1.51 | -1.73 |
| AT2G28800 | ALB3      | inner membrane protein ALBIN03                            | - | - | + | -0.37 | -1.01 | -0.63 |
| AT2G32120 | HSP70T-2  | heat-shock protein 70T-2                                  | - | - | + | -0.37 | -1.09 | -0.84 |
| AT3G26932 | DRB3      | dsRNA-binding protein 3                                   | + | - | - | -0.38 | -1.21 | -0.91 |
| AT5G14740 | CA2       | carbonic anhydrase 2                                      | + | + | + | -0.38 | -1.11 | -0.39 |
| AT1G71030 | MYBL2     | putative myb family transcription factor                  | - | + | - | -0.4  | -3.4  | -2.98 |
| AT3G47450 | NOA1      | NO-associated protein 1                                   | - | - | + | -0.4  | -0.51 | -1.39 |
| AT3G20820 | AT3G20820 | leucine-rich repeat-containing protein                    | + | - | - | -0.4  | -1.26 | -0.79 |
| AT4G21870 | AT4G21870 | heat shock protein class V 15.4                           | - | - | + | -0.4  | -2.22 | -1.93 |
| AT3G24590 | PLSP1     | plastidic type I signal peptidase 1                       | + | - | - | -0.4  | -0.53 | -1.08 |
| AT4G35090 | CAT2      | catalase 2                                                | - | - | + | -0.4  | -3.44 | 0.96  |
| AT4G37000 | ACD2      | red chlorophyll catabolite reductase                      | + | - | - | -0.4  | -1.04 | -1.4  |
| AT1G13930 | AT1G13930 | salt tolerance-related protein                            | - | - | + | -0.42 | -0.26 | -3.48 |
| AT5G27320 | GID1C     | putative gibberellin receptor GID1L3                      | - | + | - | -0.43 | -1.32 | -0.62 |
| AT1G22640 | MYB3      | transcription factor MYB3                                 | - | + | - | -0.43 | -2.15 | -0.66 |
| AT3G01480 | CYP38     | peptidyl-prolyl cis-trans isomerase CYP38                 | + | + | + | -0.45 | -0.81 | -1.07 |
| AT5G36910 | THI2.2    | thionin 2.2                                               | + | - | - | -0.45 | -2.2  | -2.51 |
| AT4G11660 | AT-HSFB2B | heat stress transcription factor B-2b                     | - | - | + | -0.46 | 0.82  | 1.39  |
| AT2G01570 | RGA1      | DELLA protein RGA                                         | - | + | + | -0.46 | -1.03 | -0.03 |
| AT5G45090 | PP2-A7    | phloem protein 2-A7                                       | + | - | - | A     | 1.17  | 1.04  |
| AT1G35680 | RPL21C    | 50S ribosomal protein L21                                 | + | - | - | -0.49 | -0.87 | -1.03 |
| AT1G76080 | CDSP32    | thioredoxin-like protein CDSP32                           | - | - | + | -0.49 | -1.18 | -1.06 |
| AT4G09650 | ATPD      | F-type H <sup>+</sup> -transporting ATPase subunit delta  | + | + | + | -0.49 | -1.5  | -1.27 |
| AT3G50700 | IDD2      | indeterminate-domain 2 protein                            | + | + | + | -0.51 | -0.54 | -2.98 |
| AT3G16670 | AT3G16670 | pollen Ole e 1 allergen and extensin family protein       | - | - | + | -0.51 | -1.22 | -1.5  |
| AT3G15850 | FAD5      | palmitoyl-monogalactosyldiacylglycerol delta-7 desaturase | + | - | - | -0.51 | -1.96 | -0.74 |
| AT4G16155 | AT4G16155 | dihydrolipoyl dehydrogenase                               | - | - | + | -0.51 | -0.89 | -1.33 |
| AT3G54920 | PMR6      | putative pectate lyase                                    | + | - | - | -0.51 | -0.63 | -1.39 |
| AT1G20620 | CAT3      | catalase 3                                                | + | - | + | -0.52 | -0.4  | -1.12 |

|           |              |                                                                   |   |   |   |       |       |       |
|-----------|--------------|-------------------------------------------------------------------|---|---|---|-------|-------|-------|
| AT2G35690 | ACX5         | acyl-CoA oxidase 5                                                | + | - | - | -0.52 | -1.41 | -0.72 |
| AT5G52100 | CRR1         | dihydrodipicolinate reductase 3                                   | + | - | - | -0.52 | -0.93 | -1.38 |
| AT3G30775 | ERD5         | proline dehydrogenase 1                                           | + | - | + | -0.52 | -0.91 | 1.2   |
| AT4G38840 | AT4G38840    | SAUR-like auxin-responsive protein                                | + | - | - | -0.55 | -2.04 | -0.63 |
| AT1G60950 | FED A        | ferredoxin-2                                                      | + | - | - | -0.56 | -1.16 | -0.49 |
| AT2G23960 | AT2G23960    | Class I glutamine amidotransferase-like superfamily protein       | + | - | - | -0.57 | -0.6  | -1.83 |
| AT1G51360 | DABB1        | dimeric A/B barrel domainS-protein 1                              | + | - | - | -0.57 | -0.94 | -1.17 |
| AT5G63310 | NDPK2        | nucleoside diphosphate kinase II                                  | - | - | + | -0.57 | -0.71 | -1.1  |
| AT1G20020 | FNR2         | ferredoxin--NADP reductase, leaf isozyme 2                        | + | + | + | -0.6  | -0.57 | -2.19 |
| AT1G03675 | THM1         | thioredoxin M1                                                    | + | - | + | -0.61 | -0.83 | -1.24 |
| AT2G31360 | ADS2         | 16:0delta9 desaturase 2                                           | + | - | - | -0.61 | -1.14 | -3.4  |
| AT1G20440 | COR47        | dehydrin COR47                                                    | + | - | - | -0.62 | -0.33 | -1.43 |
| AT5G20630 | GER3         | germin-like protein subfamily 3 member 3                          | + | - | - | -0.63 | 0.3   | -1.33 |
| AT5G63780 | SHA1         | putative E3 ligase SHA1                                           | + | + | + | -0.63 | -1.44 | -2.14 |
| AT3G03450 | RGL2         | DELLA protein RGL2                                                | - | + | + | -0.66 | -0.78 | 1.02  |
| AT1G76110 | AT1G76110    | high mobility group B protein 9                                   | + | + | + | -0.66 | -2.26 | -0.78 |
| AT1G02860 | NLA          | E3 ubiquitin-protein ligase BAH1                                  | + | + | - | -0.68 | -1.08 | -1.03 |
| AT4G39090 | RD19         | cysteine proteinase RD19a                                         | + | - | - | -0.68 | -0.28 | -1.46 |
| AT2G43010 | PIF4         | transcription factor PIF4                                         | + | + | + | -0.69 | -1.76 | -2.47 |
| AT5G51820 | PGM          | phosphoglucomutase                                                | + | - | - | -0.7  | -0.25 | -1.27 |
| AT1G68520 | BBX14        | zinc finger protein CONSTANS-LIKE 6                               | + | + | + | -0.72 | -0.35 | -2.35 |
| AT5G08280 | HEMC         | Porphobilinogen deaminase                                         | + | + | - | -0.73 | -0.84 | -1.02 |
| AT3G03630 | CS26         | cysteine synthase 26                                              | - | - | + | -0.73 | -0.36 | -1.18 |
| AT5G62410 | SMC2         | structural maintenance of chromosome 2                            | + | - | - | -0.74 | -0.19 | -1.29 |
| AT3G25010 | RLP41        | receptor like protein 41                                          | + | - | - | -0.75 | 2.61  | 5.02  |
| AT2G37220 | AT2G37220    | chloroplast RNA binding protein                                   | + | + | - | -0.75 | -0.49 | -1.07 |
| AT4G37260 | MYB73        | myb domain protein 73                                             | - | + | - | -0.76 | 0.39  | -1.12 |
| AT5G17490 | RGL3         | DELLA protein RGL3                                                | - | + | - | -0.77 | -1.54 | -3.7  |
| AT5G15410 | DND1         | cyclic nucleotide-gated ion channel 2                             | + | - | - | -0.77 | -1.41 | -0.16 |
| AT4G27450 | AT4G27450    | aluminum induced protein with YGL and LRDR motifs                 | - | + | + | -0.77 | -0.99 | 1.97  |
| AT2G44920 | AT2G44920    | thylakoid lumenal protein 1                                       | + | - | - | -0.78 | -1.45 | -1.17 |
| AT3G49870 | ARL1A1C      | ADP-ribosylation factor-like A1C                                  | + | - | - | -0.78 | -1.38 | -0.89 |
| AT2G02100 | LCR69        | defensin-like protein 2                                           | + | - | - | -0.79 | 0.51  | -1.33 |
| AT5G06290 | 2-Cys Prx I2 | Cysteine peroxiredoxin                                            | + | + | + | -0.79 | -0.65 | -1.46 |
| AT3G13750 | BGAL1        | beta galactosidase 1                                              | - | - | + | -0.8  | -1.37 | -0.83 |
| AT1G32540 | LOL1         | lsd one like 1 protein                                            | + | - | - | -0.83 | -2.09 | -1.37 |
| AT2G34600 | JAZ7         | jasmonate-zim-domain protein 7                                    | + | - | + | A     | A     | 4.42  |
| AT2G48070 | RPH1         | resistance to phytophthora 1 protein                              | + | - | + | -0.86 | -1.22 | -1.27 |
| AT1G09350 | Go1S3        | galactinol synthase 3                                             | - | - | + | -0.89 | -2.55 | -2.54 |
| AT5G09290 | AT5G09290    | Inositol monophosphatase family protein                           | - | + | + | A     | 1     | 2.19  |
| AT1G60870 | MEE9         | maternal effect embryo arrest 9 protein                           | - | - | + | -0.92 | -1.14 | 0.04  |
| AT4G38700 | AT4G38700    | disease resistance-responsive, dirigent domain-containing protein | + | - | - | -0.96 | -1.31 | -0.96 |
| AT2G39010 | PIP2E        | plasma membrane intrinsic protein 2E                              | + | + | - | -0.96 | -1.53 | -0.68 |
| AT4G30650 | AT4G30650    | putative low temperature and salt responsive protein              | + | - | - | -0.98 | 0.41  | -5.08 |
| AT2G42530 | COR15B       | cold-regulated protein 15b                                        | + | - | - | -0.99 | -0.01 | -4.99 |
| AT2G21195 | AT2G21195    | hypothetical protein                                              | - | - | + | -1.04 | -2.03 | -1    |

|           |           |                                                                 |   |   |   |       |       |       |
|-----------|-----------|-----------------------------------------------------------------|---|---|---|-------|-------|-------|
| AT3G43250 | AT3G43250 | hypothetical protein                                            | + | - | - | A     | 1.68  | A     |
| AT3G10020 | AT3G10020 | hypothetical protein                                            | - | - | + | -1.05 | -0.42 | -2.74 |
| AT1G79440 | ALDH5F1   | succinate-semialdehyde dehydrogenase                            | - | - | + | -1.05 | 0.83  | -1.23 |
| AT1G51090 | AT1G51090 | hypothetical protein                                            | + | - | - | -1.06 | -1.18 | -3.02 |
| AT2G37130 | AT2G37130 | peroxidase                                                      | + | - | - | -1.07 | -0.13 | 0.91  |
| AT2G44240 | AT2G44240 | hypothetical protein                                            | - | - | + | A     | A     | 2.2   |
| AT3G48360 | BT2       | TAC1-mediated telomerase activation pathway protein BT2         | - | + | + | A     | 2.25  | A     |
| AT3G56090 | FER3      | ferritin 3                                                      | - | - | + | -1.13 | -0.25 | 0.09  |
| AT5G08330 | TCP11     | transcription factor TCP21                                      | + | + | + | -1.21 | -1.63 | -2.47 |
| AT5G44920 | AT5G44920 | Toll-Interleukin-Resistance domain-containing protein           | + | - | - | -1.24 | -0.99 | -1.05 |
| AT1G64160 | DIR5      | dirigent-like protein DIR5                                      | + | - | - | -1.25 | -0.81 | -1.27 |
| AT4G00010 | BRCA2(IV) | breast cancer protein 2 like 2A                                 | + | - | - | -1.29 | -1.04 | -1.57 |
| AT3G05800 | AIF1      | activation-tagged BRI1 suppressor 1-interacting factor 1        | + | + | + | -1.32 | -0.42 | -1.36 |
| AT4G01970 | STS       | stachyose synthase                                              | - | - | + | -1.32 | -1.03 | -0.59 |
| AT2G28820 | PUB12     | U-box E3 ubiquitin ligase                                       | + | - | - | A     | 3.42  | A     |
| AT1G58290 | HEMA1     | glutamyl-tRNA reductase 1                                       | - | - | + | -1.4  | -3.01 | -0.25 |
| AT2G28900 | OEP16-1   | outer plastid envelope protein 16-1                             | + | - | - | -1.42 | 0.05  | -3.14 |
| AT2G15890 | MEE14     | maternal effect embryo arrest 14 protein                        | + | - | - | -1.43 | -0.37 | -4.96 |
| AT1G49010 | AT1G49010 | myb/SANT-like DNA-binding domain-containing protein             | - | + | - | -1.45 | -1.28 | 0.04  |
| AT3G47860 | CHL       | chloroplastic lipocalin                                         | - | - | + | -1.47 | -0.17 | -2.25 |
| AT4G20260 | PCAP1     | plasma-membrane associated cation-binding protein 1             | + | - | - | -1.47 | -1.26 | -0.99 |
| AT4G23310 | CRK23     | putative cysteine-rich receptor-like protein kinase 23          | + | - | - | A     | 2.62  | 4.59  |
| AT1G22770 | GI        | gigantea protein (GI)                                           | - | - | + | -1.49 | 0.01  | -3.68 |
| AT2G40300 | FER4      | ferritin 4                                                      | - | - | + | -1.54 | -1.72 | 0.65  |
| AT4G13820 | AT4G13820 | leucine-rich repeat-containing protein                          | - | + | + | A     | A     | 2.06  |
| AT5G20250 | DIN10     | putative galactinol--sucrose galactosyltransferase 6            | - | - | + | -1.57 | -1.7  | -1.56 |
| AT5G14920 | GASA14    | gibberellin-regulated protein                                   | - | - | + | -1.61 | -0.1  | -2.29 |
| AT2G42360 | AT2G42360 | E3 ubiquitin-protein ligase ATL41                               | + | - | + | A     | A     | 3.03  |
| AT4G04770 | ABC18     | ATP binding cassette protein 1                                  | - | - | + | -1.66 | -1.97 | 0.12  |
| AT1G11210 | AT1G11210 | hypothetical protein                                            | - | - | + | -1.76 | 0.19  | -2.6  |
| AT2G45760 | BAP2      | BON1-associated protein 2                                       | - | + | - | A     | 5.47  | 4.55  |
| AT1G20630 | CAT1      | catalase 1                                                      | - | - | + | -2.08 | -0.74 | -0.86 |
| AT5G01600 | FER1      | ferretin 1                                                      | - | - | + | -2.58 | -1.42 | 2.01  |
| AT2G30480 | AT2G30480 | hypothetical protein                                            | - | - | + | -2.84 | -1.41 | -1.06 |
| AT5G51720 | NEET      | NEET group protein                                              | - | - | + | -2.95 | -4.03 | 0.11  |
| AT4G04700 | CPK27     | calcium-dependent protein kinase 27                             | - | + | + | -3.13 | 0.17  | -0.29 |
| AT5G40990 | GLIP1     | GDSL lipase 1                                                   | + | + | - | A     | A     | 1.08  |
| AT1G09340 | CRB       | chloroplast stem-loop binding protein                           | + | + | + | A     | A     | A     |
| AT4G02530 | AT4G02530 | chloroplast thylakoid lumen protein                             | + | + | - | A     | A     | A     |
| AT3G23700 | AT3G23700 | ribosomal protein S1-like RNA-binding domain-containing protein | + | - | - | A     | A     | A     |
| AT5G03940 | CPSRP54   | chloroplast signal recognition particle 54                      | + | - | - | A     | A     | A     |
| AT3G04120 | GAPC1     | glyceraldehyde-3-phosphate dehydrogenase C subunit 1            | - | - | + | A     | A     | A     |
| AT3G01500 | CA1       | carbonic anhydrase 1                                            | + | + | + | A     | A     | A     |
| AT1G02200 | CER1      | protein ECERIFERUM 1                                            | + | - | - | A     | A     | A     |
| AT5G58260 | NdhN      | NADH dehydrogenase-like complex N                               | + | - | - | A     | A     | A     |
| AT3G22400 | LOX5      | lipoxygenase 5                                                  | + | - | - | A     | A     | A     |



|           |            |                                                                      |   |   |   |   |   |   |
|-----------|------------|----------------------------------------------------------------------|---|---|---|---|---|---|
| AT2G46600 | AT2G46600  | Calcium-binding EF-hand family protein                               | - | - | + | A | A | A |
| AT4G23670 | AT4G23670  | polyketide cyclase/dehydrase and lipid transport superfamily protein | + | - | - | A | A | A |
| AT1G14980 | CPN10      | chaperonin 10                                                        | - | - | + | A | A | A |
| AT5G47190 | AT5G47190  | 50S ribosomal protein L19-2                                          | + | - | - | A | A | A |
| AT1G42970 | GAPB       | glyceraldehyde-3-phosphate dehydrogenase B                           | + | - | + | A | A | A |
| AT3G23010 | RLP36      | receptor like protein 36                                             | + | - | - | A | A | A |
| AT1G66100 | AT1G66100  | probable thionin-2.4                                                 | + | - | - | A | A | A |
| AT4G32190 | AT4G32190  | myosin heavy chain-related protein                                   | - | - | + | A | A | A |
| AT3G15020 | mMDH2      | malate dehydrogenase 2                                               | + | - | - | A | A | A |
| AT1G35580 | CINV1      | alkaline/neutral invertase CINV1                                     | - | - | + | A | A | A |
| AT3G25070 | RIN4       | RPM1 interacting protein 4                                           | + | - | - | A | A | A |
| AT1G59620 | CW9        | disease resistance (CC-NBS-LRR class) family protein                 | + | - | - | A | A | A |
| AT1G63350 | AT1G63350  | CC-NBS-LRR class disease resistance protein                          | + | - | - | A | A | A |
| AT4G17560 | AT4G17560  | 50S ribosomal protein L19-1                                          | + | - | - | A | A | A |
| AT3G59080 | AT3G59080  | aspartyl protease family protein                                     | + | - | - | A | A | A |
| AT3G04290 | LTL1       | Li-tolerant lipase 1                                                 | - | + | - | A | A | A |
| AT1G11260 | STP1       | sugar transporter 1                                                  | + | - | - | A | A | A |
| AT2G02130 | LCR68      | defensin-like protein 1                                              | + | - | - | A | A | A |
| AT2G45070 | SEC61 BETA | protein transport protein sec61 subunit beta                         | - | - | + | A | A | A |
| AT2G33800 | EMB3113    | 30S ribosomal protein S5                                             | + | - | - | A | A | A |
| AT1G11860 | AT1G11860  | aminomethyltransferase                                               | - | - | + | A | A | A |
| AT1G79380 | RGLG4      | ubiquitin ligase                                                     | + | - | - | A | A | A |
| AT2G26330 | ER         | LRR receptor-like serine/threonine-protein kinase ERECTA             | + | - | - | A | A | A |
| AT2G35370 | GDCH       | glycine decarboxylase complex protein H                              | + | + | - | A | A | A |
| AT3G54560 | HTA11      | histone H2A 11                                                       | + | - | - | A | A | A |
| AT5G02480 | AT5G02480  | HSP20-like chaperone                                                 | - | - | + | A | A | A |
| AT1G69690 | TCP15      | transcription factor TCP15                                           | + | + | + | A | A | A |
| AT3G50060 | MYB77      | myb domain protein 77                                                | - | + | - | A | A | A |
| AT2G29450 | GSTU5      | glutathione S-transferase tau 5                                      | - | - | + | A | A | A |
| AT3G49220 | AT3G49220  | putative pectinesterase/pectinesterase inhibitor 34                  | - | - | + | A | A | A |
| AT2G20570 | GPRI1      | transcription activator GLK1                                         | + | + | + | A | A | A |
| AT4G14420 | AT4G14420  | HR-like lesion-inducing protein-like protein                         | - | - | + | A | A | A |
| AT4G18950 | AT4G18950  | Integrin-linked protein kinase family protein                        | - | + | - | A | A | A |
| AT3G16950 | LPD1       | lipoamide dehydrogenase 1                                            | - | - | + | A | A | A |
| AT2G24150 | HHP3       | heptahelical protein 3                                               | - | - | + | A | A | A |
| AT2G28190 | CSD2       | copper/zinc superoxide dismutase 2                                   | - | - | + | A | A | A |
| AT3G19930 | STP4       | sugar transport protein 4                                            | - | - | + | A | A | A |
| AT5G45800 | MEE62      | protein MATERNAL EFFECT EMBRYO ARREST 62                             | + | - | - | A | A | A |
| AT3G46130 | MYB48      | transcription factor MYB48                                           | - | + | - | A | A | A |
| AT4G16860 | RPP4       | TIR-NBS-LRR class disease resistance protein                         | + | - | - | A | A | A |
| AT4G19530 | AT4G19530  | TIR-NBS-LRR class disease resistance protein                         | + | - | - | A | A | A |
| AT5G15310 | MYB16      | myb domain protein 16                                                | - | + | - | A | A | A |
| AT3G26520 | TIP2       | aquaporin TIP1-2                                                     | + | - | + | A | A | A |
| AT2G41560 | ACA4       | autoinhibited Ca(2+)-ATPase 4                                        | + | - | - | A | A | A |
| AT1G49430 | LACS2      | long-chain acyl-CoA synthetase 2                                     | + | - | - | A | A | A |
| AT3G45290 | ML03       | MLO-like protein 3                                                   | + | - | - | A | A | A |

|           |           |                                                 |
|-----------|-----------|-------------------------------------------------|
| AT3G28460 | AT3G28460 | methyltransferase                               |
| AT1G54050 | AT1G54050 | CIII heat shock protein 17.4                    |
| AT5G18100 | CSD3      | copper/zinc superoxide dismutase 3              |
| AT4G36030 | AR03      | armadillo repeat only 3                         |
| AT3G07780 | OBE1      | protein OBERON 1                                |
| AT5G61420 | MYB28     | transcription factor MYB28                      |
| AT1G02205 | CER1      | protein ECERIFERUM 1                            |
| AT1G66350 | RGL1      | DELLA protein RGL1                              |
| AT5G50460 | AT5G50460 | protein transport protein sec61 subunit gamma-1 |
| AT5G16000 | NIK1      | NSP-interacting kinase 1                        |
| AT3G11650 | NHL2      | NDR1/HIN1-Like protein 2                        |
| AT3G11630 | AT3G11630 | 2-Cys peroxiredoxin BAS1                        |

|   |   |   |   |   |   |
|---|---|---|---|---|---|
| + | - | - | A | A | A |
| - | - | + | A | A | A |
| - | - | + | A | A | A |
| + | + | - | A | A | A |
| + | - | - | A | A | A |
| + | - | - | A | A | A |
| - | + | + | A | A | A |
| - | - | + | A | A | A |
| + | - | - | A | A | A |
| + | - | - | A | A | A |
| + | + | + | A | A | A |
