# Supplementary material for: A Novel Pyrimidin-Like Plant Activator Stimulates Plant Disease Resistance and Promotes Growth
Source: PubMed Central journal article supplement (PMC4388471; doi:10.1371/journal.pone.0123227), 2015-04-07
Supplement: pone.0123227.s006.pdf [file pone.0123227.s006.pdf]

**S3 Table. Primers used in this study.**

|          | <b>Forward</b>              | <b>Reverse</b>             |
|----------|-----------------------------|----------------------------|
| ACT2     | GGTAACATTGTGCTCAGTGGTGG     | GGTGCAACGACCTTAATCTTCAT    |
| EDS1     | TCTACGCTCAATGACCTT          | CACCTGAATAATCTTCTTCTGAT    |
| PAD4     | TGACGCAATGGAGACTTA          | TGATGAACAACAATGATACAGA     |
| FMO1     | CTGGTTATGATGGCAAGAAG        | GCTCTGATGTGTGTAAGTTC       |
| PBS3     | GAATTAGCAGACACTATTGAAGA     | CTCCGAAGAACCGTAAGT         |
| WRKY40   | TCTCACTATTGGCGTTACT         | CTTCTTGTTCTCAGCACTAA       |
| AGP5     | TGTTGCTGTAGAGGCTATT         | AAGAATGCCAATAATCAAGGAA     |
| PR1      | GTGAGGTGTAACAATGGTGGAA      | CTTCATTAGTATGGCTTCTCGTTCA  |
| PR2      | GCTACAGAGATGGTGTGAGATT      | GTATCAGTGGTGGTGTGAGT       |
| PR5      | CACAGACTTCACTCTAAGGAACA     | AAGCACCTGGAGTCAATTCAA      |
| ALD1     | GCTACTCTTAGGCTCCAA          | TCTGACCGATTATCACACTT       |
| GST1     | CCGTTTGTTTTTGGTTTATTCACTAAA | GATGAAAAGAAATACACAAATGGGAG |
| SID2     | AGTTCTGTCTTCAACCACCTG       | TCTATCTCCATATCACGAGCACTA   |
| CYP71A13 | GGGTAGAGGCTGGACCAAAT        | ACAACCGAAGATGGAAATGC       |
| PAD3     | GGTACGGGATAAATCTCTATGA      | AGATACAGTCGATGAACCTAC      |
| PRX33    | AATGTCCTCGCAATGGTAATCAA     | ACTCTTGGTCGCTCTGGATAA      |
| PRX34    | CCTACACTCAACTACTTACCT       | CTCTTGGTCGCTCTGGATAA       |
| APX1     | GACTATCATCAACAGCGGCTAG      | TGGCGAAGAGTGAAGTGAGT       |
| WRKY30   | ATCAGTTACCGAGGAATACAT       | GTAGATGACAATGGATAGTGAAG    |

---

|        |                        |                         |
|--------|------------------------|-------------------------|
| WRKY33 | GAATGGTGGTGGGAAGCAAGA  | CTGTAACCGTCGTCGAAGAATGT |
| RBOHD  | GCCGAGCCGTATCTCCATTC   | TCCAATGCCGAGACCTACGA    |
| RBOHF  | TCACAAATCAACGACGAGAGTT | CCCATCTTCATTCTTGCCA     |

---
