# Supplementary material for: A Novel Pyrimidin-Like Plant Activator Stimulates Plant Disease Resistance and Promotes Growth
Source: PLoS One. 2015 Apr 7;10(4):e0123227. doi: 10.1371/journal.pone.0123227 (PMC4388471; doi:10.1371/journal.pone.0123227)
Supplement: S2 Table — (PDF) [file pone.0123227.s005.pdf]

## **S2 Table. Screen conditions of GO term**

### **1. Defense:**

GO:0052542: defense response by callose deposition

GO:0051607: defense response to virus

GO:0002213: defense response to insect

GO:0042742: defense response to bacterium

GO:0050832: defense response to fungus

GO:0006952: defense response

GO:0031347: regulation of defense response

### **2. ROS**

GO:0042744: hydrogen peroxide catabolic process

GO:0010310: regulation of hydrogen peroxide metabolic process

GO:0042542: response to hydrogen peroxide

GO:0004784: superoxide dismutase activity

GO:0002679: respiratory burst involved in defense response

GO:2000377: regulation of reactive oxygen species metabolic process

GO:0034599: cellular response to oxidative stress

GO:0072593: reactive oxygen species metabolic process

GO:0000302: response to reactive oxygen species

GO:0050665: hydrogen peroxide biosynthetic process

### **3. Salicylic Acid**

GO:0009863: salicylic acid mediated signaling pathway

GO:0052639: salicylic acid glucosyltransferase (ester-forming) activity

GO:0052640: salicylic acid glucosyltransferase (glucoside-forming) activity

GO:0080151: positive regulation of salicylic acid mediated signaling pathway  
salicylic acid mediated signaling pathway

GO:2000031: regulation of salicylic acid mediated signaling pathway  
regulation of salicylic acid biosynthetic process  
salicylic acid mediated signaling pathway

GO:0009751: response to salicylic acid  
regulation of salicylic acid metabolic process

GO:0046244: salicylic acid catabolic process  
response to salicylic acid stimulus

GO:0010337: regulation of salicylic acid metabolic process

GO:0009697: salicylic acid biosynthetic process

GO:0080142: regulation of salicylic acid biosynthetic process
